# Supplementary material for: Interactions between land-use change and climate warming drive long-term wild bee declines
Source: Research Square preprint supplement (doi:10.21203/rs.3.rs-5705933/v1), 2025-01-01
Supplement: Supplementary file 1 [file 867f9ca2df9ada582afe7a36.docx]

## Supplements


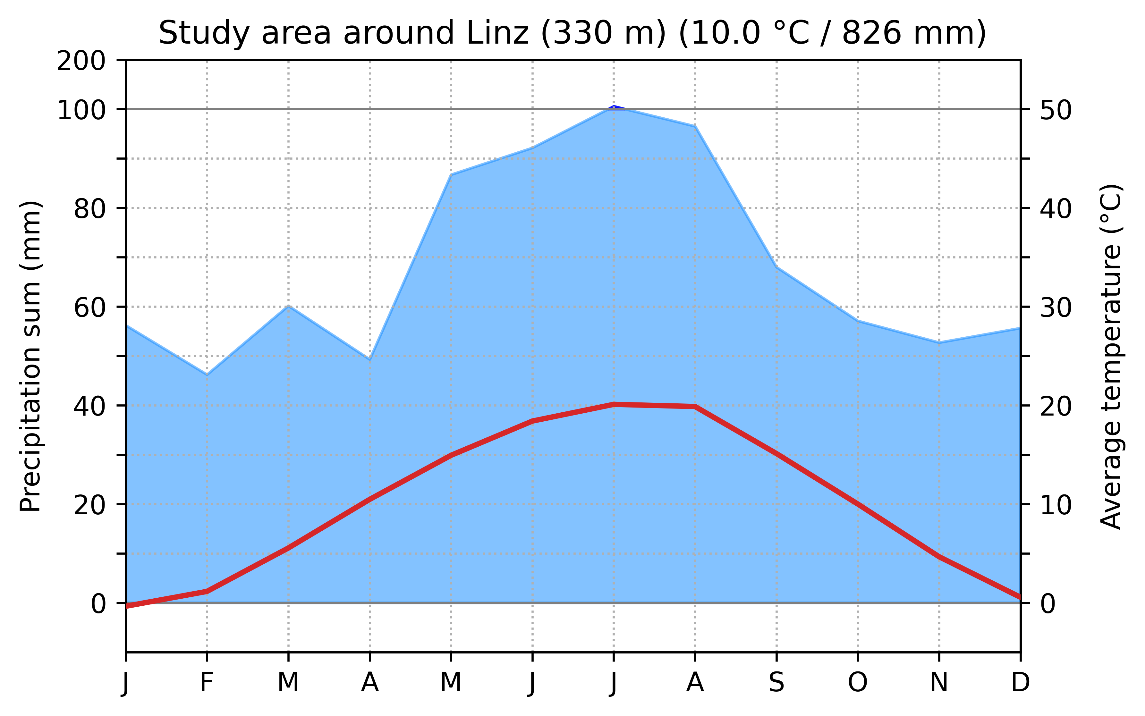


Fig. S1 | Walter-Lieth climate diagram of the study area showing the seasonal cycle of average temperatures (red curve, right y-axis) and precipitation sums (blue area, left y-axis). Each monthly value describes the average of the period 1991 – 2020. Data source:42


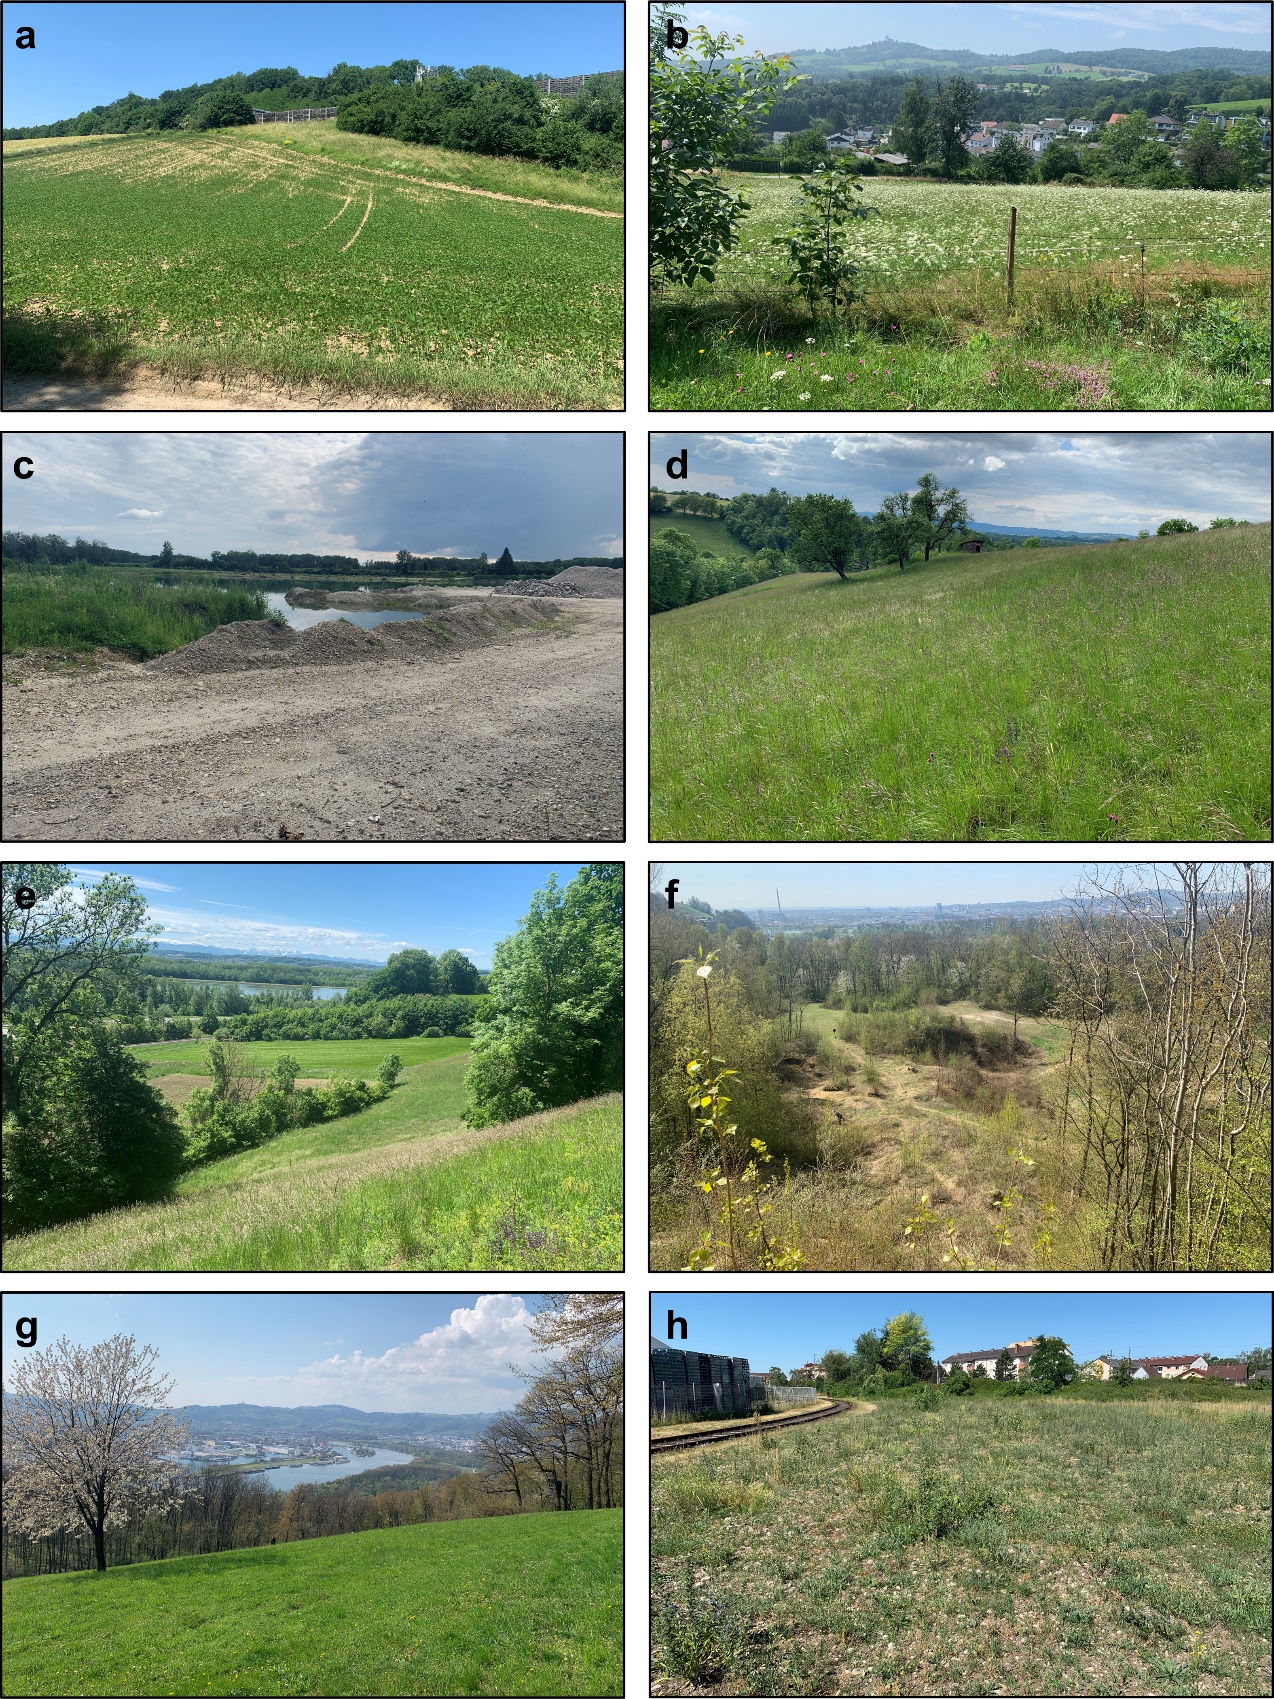


Fig. S2 | Pictures of wild bee sampling sites (a) Ebelsberg (taken at 18.06.2021) (b) Gründberg (taken at 26.7.2021) (c) Pulgarn (taken at 16.7.2021) (d) Mühlbach (taken at 28.5.2021) (e) Luftenberg (taken at 26.5.2021) (f) Plesching (taken at 24.4.2021) (g) Pfenningberg (taken at 21.4.2021) (h) Wegscheid (taken at 30.6.2019). © Esther Ockermüller


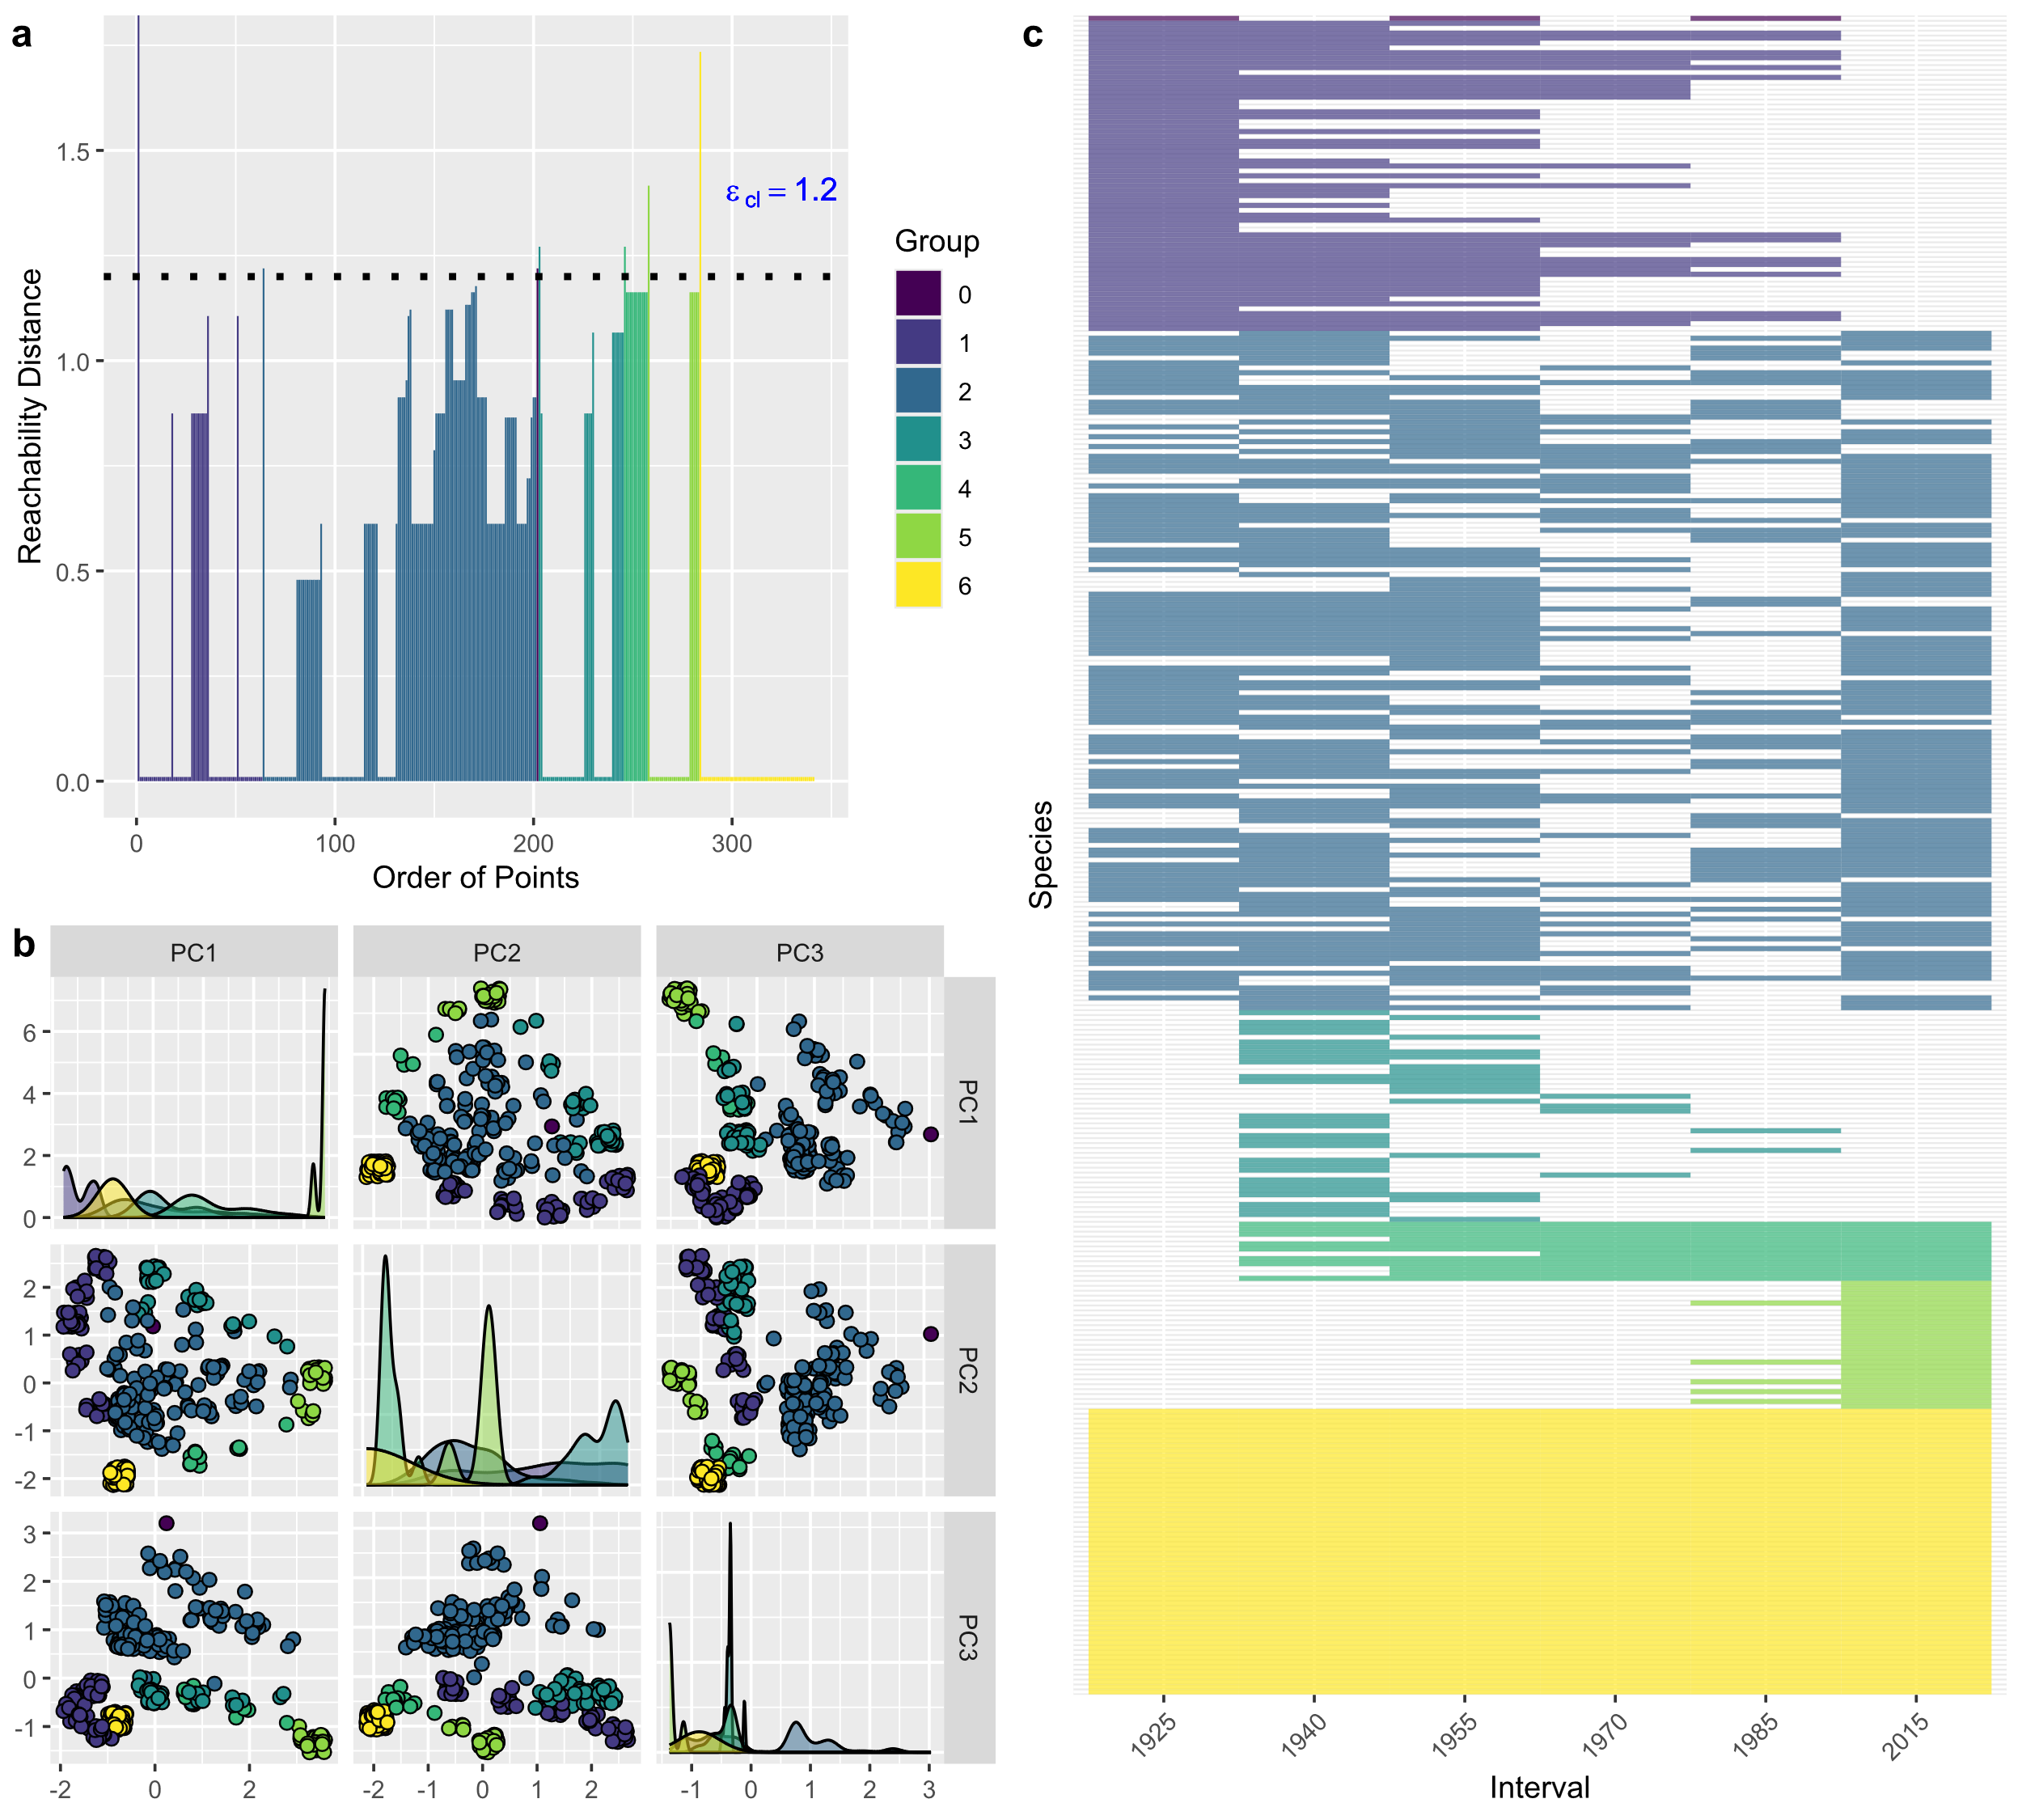


Fig. S3 | Clustering analysis of wild bee species based on temporal occurrence metrics using OPTICS with all groups displayed separately.

**a**, Reachability plot generated from the OPTICS clustering algorithm. The plot shows the reachability distance for each species in the order of points. Groups were extracted using an epsilon value of 1.2, as indicated by the horizontal dashed line. Colours represent the identified species groups **b**, Principal Component Analysis (PCA) plots illustrating the separation of species groups based on the first three principal components (PC1 vs. PC2, PC1 vs. PC3, and PC2 vs. PC3). Points are coloured according to the four species groups identified in panel **a**. The diagonal shows density plots, while the upper and lower panels display jittered (to reduce overlap of points) scatterplots with black outlines, representing individual species. **c**, Heatmap displaying the presence or absence of species across the different time intervals. Each coloured tile represents the occurrence of a species in a specific interval, with colours corresponding to the groups defined by OPTICS.


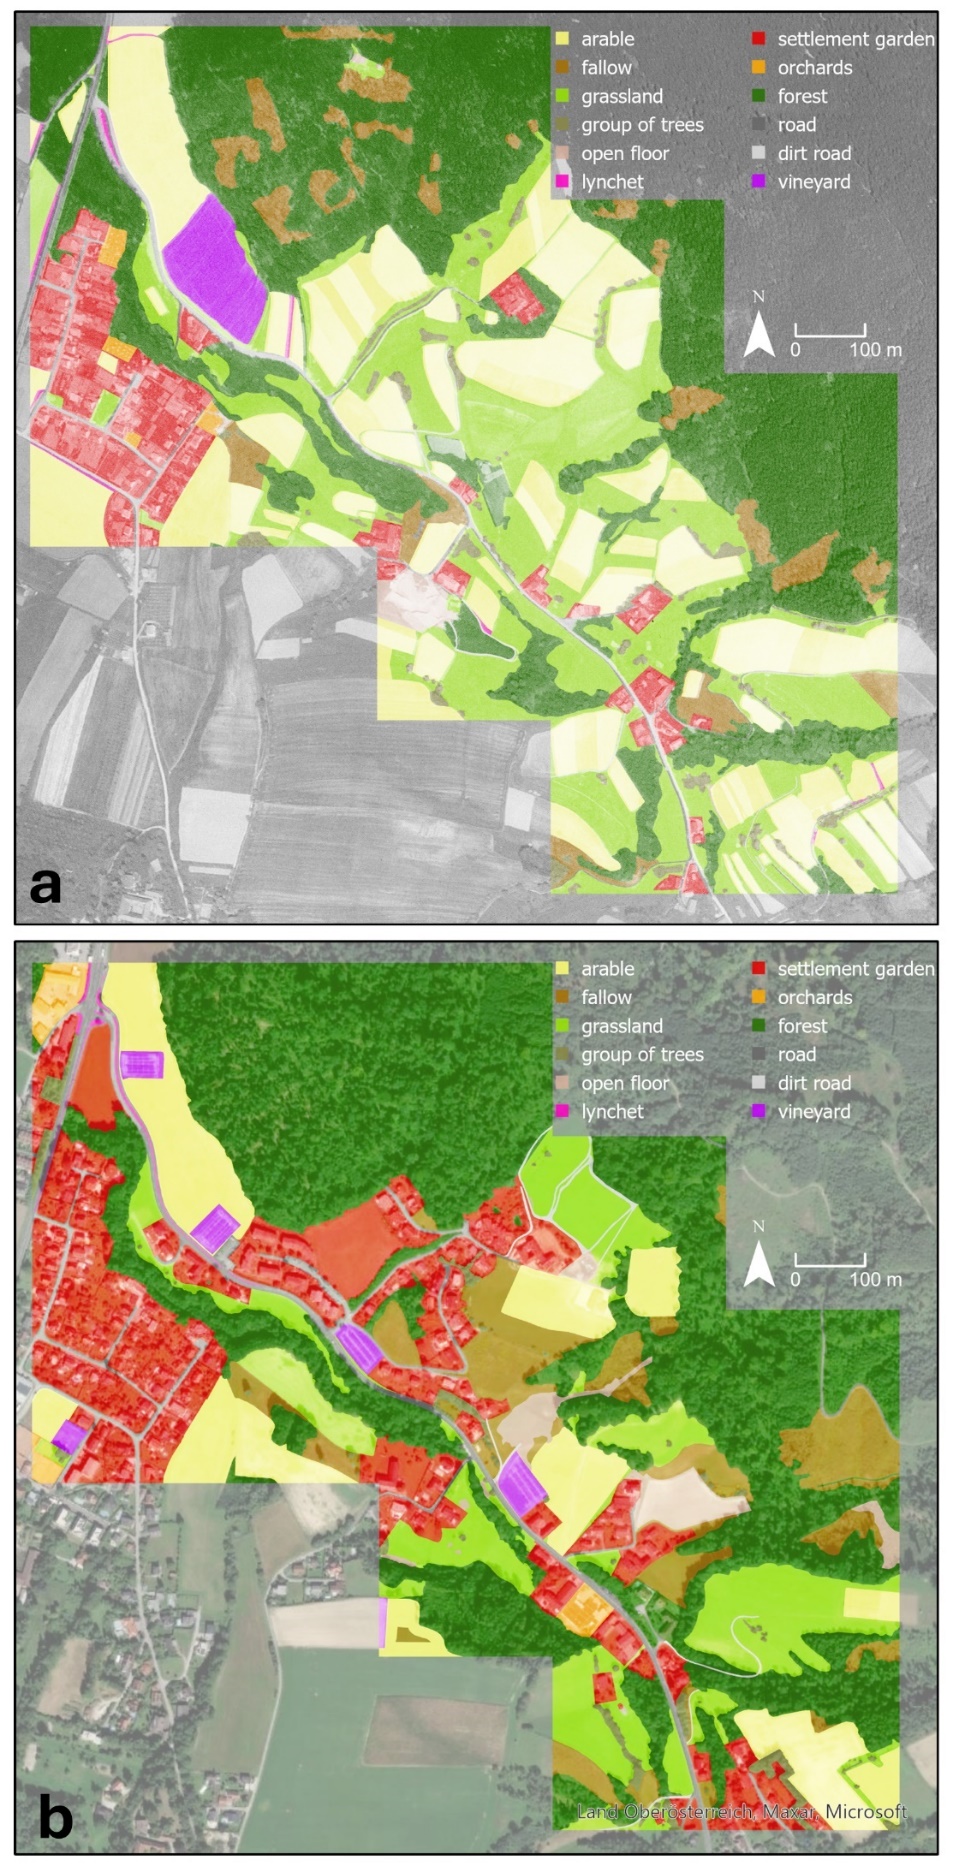


Fig. S4 | Exemplary map of land-use changes at the sampling site Mühlbach.

Digitized land-use categories are shown for **a,** 1950 (aerial image) and **b**, 2020 (satellite image). Categories: yellow = arable land, brown = fallow, light green = grassland, olive = group of trees, light brown = open floor, pink = lynchet, red = settlements with gardens, orange = orchards, dark green = forests, dark grey = roads, light grey = dirt roads, purple = vineyards.

Tab. S2 | Temporal metrics of wild bee species groups. This table presents the temporal metrics (average ± standard deviation) used to characterize the wild bee species groups identified by the OPTICS analysis. Each metric is defined as follows: First appearance: The average time interval when species within the cluster first appeared in the dataset. Last appearance: The average time interval when species within the cluster last appeared. Trend slope: The average slope of the trend line for species presence over time, indicating whether the species' presence is increasing, decreasing, or stable. Turnover rate: The average number of times species within the cluster switch between presence and absence in the dataset. Ubiquity: The average proportion of time intervals in which species within the cluster are present, indicating how widespread the species are across the time intervals.

| Group | First appearance | Last appearance | Trend slope | Turnover rate | Ubiquity |
| --- | --- | --- | --- | --- | --- |
| Reference | **1.4** ± 0.71 | **5.74** ± 0.61 | **-0.03** ± 0.09 | **1.28** ± 0.34 | **0.6** ± 0.17 |
| Disappearing | **1.63** ± 0.94 | **2.85** ± 1.24 | **-0.14** ± 0.09 | **0.7** ± 0.25 | **0.37** ± 0.24 |
| Appearing | **4.74** ± 1.67 | **6** ± 0 | **0.16** ± 0.04 | **0.5** ± 0 | **0.38** ± 0.28 |
| Omnipresent | **1** ± 0 | **6** ± 0 | **0** ± 0 | **0** ± 0 | **1** ± 0 |

Tab. S3 | Results of binomial GLM analysis for trait distribution among bee species clusters.

This table presents the results of binomial generalized linear models assessing the relationships between bee species clusters and various ecological traits, using the 'Reference' group as the baseline. The table reports the estimated coefficients (Estimate), standard errors (s.e.), z-statistics (z), and *p*-values (*p*) for each term. Trait abbreviations are as follows: S: Solitary—species with a solitary life cycle; S: Social—species with a social life cycle; S: Parasitic—species with a parasitic life cycle; P: Oligophagous—species that prefer a limited range of pollen sources; P: Polyphagous—species that utilize a wide range of pollen sources; N: Belowground—species nesting below ground; N: Aboveground—species nesting above ground. Microclimatic preferences are denoted as MiC: Broad (tolerant of a wide range of microclimatic conditions), MiC: Cool (preferring cool microclimates), MiC: Moist (preferring moist microclimates), MiC: Dry (preferring dry microclimates), and MiC: Warm (preferring warm microclimates). Macroclimatic distributions are indicated by MaC: Undifferentiated (not specific to any macroclimatic zone), MaC: Atlantic (associated with the Atlantic macroclimate), MaC: European (associated with the general European climate), MaC: Continental (associated with continental climates), and MaC: Mediterranean (associated with the Mediterranean climate). Habitat preferences are represented by H: Eurytopic/Pioneer (adaptable species often found in various habitats or early successional stages), H: Edge/Margins (species typically found at habitat edges or margins), and H: Open-Space (species that prefer open landscapes like grasslands or fields).

| Trait | Group | Estimate | s.e. | z-statistic | p-value |
| --- | --- | --- | --- | --- | --- |
| S: Solitary | (Intercept) | 0.48 | 0.176 | 2.718 | 0.007 |
| S: Solitary | Disappearing | 0.031 | 0.269 | 0.116 | 0.907 |
| S: Solitary | Appearing | 0.091 | 0.389 | 0.234 | 0.815 |
| S: Solitary | Omnipresent | 0.013 | 0.323 | 0.04 | 0.968 |
| S: Social | (Intercept) | -1.946 | 0.259 | -7.505 | **<0.001** |
| S: Social | Disappearing | -0.539 | 0.45 | -1.197 | 0.231 |
| S: Social | Appearing | -0.887 | 0.772 | -1.149 | 0.251 |
| S: Social | Omnipresent | -0.415 | 0.535 | -0.776 | 0.438 |
| S: Parasitic | (Intercept) | -1.079 | 0.196 | -5.517 | **<0.001** |
| S: Parasitic | Disappearing | 0.196 | 0.29 | 0.676 | 0.499 |
| S: Parasitic | Appearing | 0.181 | 0.408 | 0.445 | 0.656 |
| S: Parasitic | Omnipresent | 0.199 | 0.349 | 0.571 | 0.568 |
| P: Oligophagous | (Intercept) | -1.239 | 0.204 | -6.074 | **<0.001** |
| P: Oligophagous | Disappearing | 0.309 | 0.297 | 1.042 | 0.297 |
| P: Oligophagous | Appearing | 0.209 | 0.421 | 0.497 | 0.619 |
| P: Oligophagous | Omnipresent | -0.213 | 0.392 | -0.544 | 0.586 |
| P: Polyphagous | (Intercept) | 0.087 | 0.17 | 0.511 | 0.610 |
| P: Polyphagous | Disappearing | -0.391 | 0.26 | -1.504 | 0.133 |
| P: Polyphagous | Appearing | -0.298 | 0.368 | -0.81 | 0.418 |
| P: Polyphagous | Omnipresent | -0.018 | 0.313 | -0.058 | 0.954 |
| N: Belowground | (Intercept) | 0.145 | 0.171 | 0.851 | 0.395 |
| N: Belowground | Disappearing | 0.237 | 0.261 | 0.906 | 0.365 |
| N: Belowground | Appearing | -0.356 | 0.368 | -0.968 | 0.333 |
| N: Belowground | Omnipresent | -0.007 | 0.314 | -0.022 | 0.982 |
| N: Aboveground | (Intercept) | -0.932 | 0.189 | -4.927 | **<0.001** |
| N: Aboveground | Disappearing | -0.951 | 0.344 | -2.769 | **0.006** |
| N: Aboveground | Appearing | 0.393 | 0.386 | 1.018 | 0.309 |
| N: Aboveground | Omnipresent | -0.521 | 0.385 | -1.354 | 0.176 |
| MiC: Warm | (Intercept) | 0.322 | 0.172 | 1.865 | **0.062** |
| MiC: Warm | Disappearing | 0.829 | 0.287 | 2.888 | **0.004** |
| MiC: Warm | Appearing | 0.848 | 0.419 | 2.026 | **0.043** |
| MiC: Warm | Omnipresent | -0.599 | 0.316 | -1.894 | **0.058** |
| MiC: Broad | (Intercept) | -1.118 | 0.198 | -5.659 | **<0.001** |
| MiC: Broad | Disappearing | -1.239 | 0.401 | -3.09 | **0.002** |
| MiC: Broad | Appearing | -0.769 | 0.519 | -1.482 | 0.138 |
| MiC: Broad | Omnipresent | 1.187 | 0.329 | 3.611 | **<0.001** |
| MiC: Cool | (Intercept) | -1.775 | 0.242 | -7.34 | **<0.001** |
| MiC: Cool | Disappearing | -0.171 | 0.383 | -0.447 | 0.655 |
| MiC: Cool | Appearing | -0.365 | 0.581 | -0.628 | 0.530 |
| MiC: Cool | Omnipresent | -1.557 | 0.759 | -2.051 | **0.040** |
| MiC: Moist | (Intercept) | -3.091 | 0.417 | -7.406 | **<0.001** |
| MiC: Moist | Disappearing | 0.606 | 0.556 | 1.089 | 0.276 |
| MiC: Moist | Appearing | 0.634 | 0.732 | 0.866 | 0.386 |
| MiC: Moist | Omnipresent | 0.182 | 0.725 | 0.251 | 0.801 |
| MiC: Dry | (Intercept) | -0.827 | 0.185 | -4.468 | **<0.001** |
| MiC: Dry | Disappearing | 0.595 | 0.271 | 2.199 | **0.028** |
| MiC: Dry | Appearing | 0.721 | 0.374 | 1.929 | **0.054** |
| MiC: Dry | Omnipresent | -1.006 | 0.423 | -2.376 | **0.017** |
| MaC: Continental | (Intercept) | -4.22 | 0.712 | -5.924 | **<0.001** |
| MaC: Continental | Disappearing | 2 | 0.786 | 2.544 | **0.011** |
| MaC: Continental | Appearing | 2.079 | 0.887 | 2.344 | **0.019** |
| MaC: Continental | Omnipresent | 1.311 | 0.927 | 1.414 | 0.157 |
| MaC: Mediterranean | (Intercept) | -3.091 | 0.417 | -7.405 | **<0.001** |
| MaC: Mediterranean | Disappearing | 0.627 | 0.557 | 1.127 | 0.260 |
| MaC: Mediterranean | Appearing | 1.921 | 0.566 | 3.397 | **0.001** |
| MaC: Mediterranean | Omnipresent | -16.475 | 1412.071 | -0.012 | 0.991 |
| MaC: European | (Intercept) | -2.663 | 0.345 | -7.723 | **<0.001** |
| MaC: European | Disappearing | -0.11 | 0.544 | -0.202 | 0.840 |
| MaC: European | Appearing | 1.175 | 0.542 | 2.166 | **0.030** |
| MaC: European | Omnipresent | -16.903 | 1412.071 | -0.012 | 0.990 |
| MaC: Undifferentiated | (Intercept) | 1.157 | 0.2 | 5.8 | **<0.001** |
| MaC: Undifferentiated | Disappearing | -1 | 0.282 | -3.552 | **<0.001** |
| MaC: Undifferentiated | Appearing | -1.585 | 0.387 | -4.093 | **<0.001** |
| MaC: Undifferentiated | Omnipresent | 0.675 | 0.43 | 1.57 | 0.116 |
| MaC: Atlantic | (Intercept) | -2.788 | 0.364 | -7.654 | **<0.001** |
| MaC: Atlantic | Disappearing | 1.106 | 0.455 | 2.433 | **0.015** |
| MaC: Atlantic | Appearing | 0.331 | 0.703 | 0.471 | 0.638 |
| MaC: Atlantic | Omnipresent | 0.427 | 0.593 | 0.721 | 0.471 |
| H: Eurytopic/Pioneer | (Intercept) | -1.826 | 0.247 | -7.388 | **<0.001** |
| H: Eurytopic/Pioneer | Disappearing | -1.403 | 0.566 | -2.476 | **0.013** |
| H: Eurytopic/Pioneer | Appearing | -0.63 | 0.65 | -0.969 | 0.332 |
| H: Eurytopic/Pioneer | Omnipresent | 1.478 | 0.364 | 4.065 | **<0.001** |
| H: Open-Space | (Intercept) | -0.309 | 0.173 | -1.787 | **0.074** |
| H: Open-Space | Disappearing | 0.918 | 0.268 | 3.428 | **0.001** |
| H: Open-Space | Appearing | 0.736 | 0.374 | 1.968 | **0.049** |
| H: Open-Space | Omnipresent | -0.183 | 0.321 | -0.571 | 0.568 |
| H: Edge/Margins | (Intercept) | -0.339 | 0.173 | -1.956 | **0.051** |
| H: Edge/Margins | Disappearing | -0.441 | 0.272 | -1.619 | 0.105 |
| H: Edge/Margins | Appearing | -0.559 | 0.397 | -1.406 | 0.160 |
| H: Edge/Margins | Omnipresent | -1.005 | 0.368 | -2.733 | **0.006** |

### S1.1 Description of sampling localities

In the following, we present a detailed introduction to the eight sampling localities of the dataset (photos of the localities are shown in Figure S2):

Mühlbach: The Mühlbach area, extending from the village of Wilhering to Dörnbach, is situated approximately 8 km west of Linz, at the foot of Kürnbergerwald. The Kürnberg itself rises to 526 meters and is a recreational area with oak and hornbeam forests. The steep south and southwest slopes west of Kürnbergerwald harbour Pontic-Submediterranean steppe relics (e.g., pasqueflower). An abandoned vineyard highlights the area's warm climate. The loess soil is nutrient-rich and deep. Some of the meadows are maintained by the Haibach Nature Conservation Group.

Gründberg: Gründberg, including Bachl and Bachlberg, is a district in Linz, located north of the Danube. The district covers about 3 km² and lies on the slopes of Gründberg, an extension of the Mühlviertel hill country. The primary rocks are granite and gneiss, overlain by sandy deposits. The area is sparsely wooded, featuring south-facing, managed meadows and individual loess walls. Several hiking trails across the area. The "Zur Waldschenke" inn was a popular destination for entomologists.

Plesching: The Pleschinger Sand Pit, or "Oyster Bank near Plesching," is a fossil relic from the Tertiary Sea's shoreline. Sand was mined here from 1890 to 1950. In 1998, the sand pit and surrounding mixed forest were designated a nature reserve, leading to significant shrub encroachment. Since 2015, the Nature Conservation Foundation has been regularly clearing the area. The central area features large open sand surfaces and sparsely vegetated spots, with a vertical, south-facing loess wall to the north.

Pfenningberg: The Pfenningberg ranges in elevation from 260 to 616 meters above sea level. The main rocks are granite and gneiss of the Bohemian Massif, with younger deposits forming sandy coastal sediments (Linzer Sand) covered by loess loam. The Pfenningberg is now more forested than before, primarily with oak, hornbeam, beech, and fir. The south-facing, agriculturally used meadows have mostly lost their nutrient-poor grassland character. The Pfenningberg remains a popular recreational area for hikers.

Wegscheid: Wegscheid, including Doppl and St. Martin, is an area south of Linz that once covered seven square kilometres. It is part of the Wels Heath, largely a xerothermic, steppe-like terrain with alluvial gravel soil. As Linz expanded, much of Wegscheid was developed. The remaining railway wasteland and adjacent areas are maintained by the Upper Austrian State Nature Conservation Department to preserve valuable remnants.

Ebelsberg: The Schiltenberg (Ebelsberg, Mönchgraben) rises to 337 meters and gently slopes eastward to 45 meters. The entire area covers about 170 hectares. The Schiltenberg consists of conglomerate and sandstone and is forested. The Mönchgraben is an east-west valley in the southern part of the Schiltenberg plateau. In 1939, highway construction began through the Mönchgraben but was halted from 1942-1955 due to the war, creating diverse habitats along the cut route. The highway construction was completed between 1955-1958, destroying many habitats.

Pulgarn: The Pulgarn area, including Steyregg, is mainly a riparian forest. The village is about 6 km east of Linz, 2.5 km east of Steyregg, and 2 km north of the Danube along the Mühlviertel fringe. Since the original habitats have largely been destroyed or altered, an active but structurally rich gravel pit along the Danube was chosen as a replacement area. The riparian forest includes heatlands, managed meadows, ruderal areas, tall herb communities, and small earth cuttings.

Luftenberg: Between Linz and Mauthausen, a gentle hilly landscape stretches along the northern bank of the Danube. Luftenberg is a 400-meter-high hill located about 8 km east of Linz, at the southern edge of the Bohemian Massif crystalline. Today, the forest on Luftenberg has expanded, but some steep, south-facing slopes with dry grassland characteristics remain and are regularly maintained by the Nature Conservation Foundation. There is also an old, long-abandoned quarry in the area.

### S1.2 Biographies of historical collectors

Here, we present a brief introduction to the principal collectors who contributed to the dataset (photos of the collectors are shown in Figure S1):

Josef Kloiber (born 1872, Sarleinsbach) joined the postal service after graduating from high school in 1892. He was a member of the Association for Natural History and co-founder of the Entomological Working Group at the Biology Center. Initially, Kloiber focused on beetles but later shifted to Hymenoptera, particularly Symphyta, on the advice of Hermann Priesner. Following his death in 1955, his collection was transferred to the Upper Austrian State Museum.

Hans Gföllner (born 1877, Linz) entered the service of the Austro-Hungarian Government in 1895 after finishing school. He soon joined the Association for Natural History in Upper Austria, where Emil Munganast, the chairman at the time, encouraged him to study Hymenoptera instead of butterflies. Gföllner primarily collected wild bees around Linz and left a collection of approximately 12,000 specimens to the State Museum. In 1920, he was appointed a scientific collaborator at the Upper Austrian State Museum. He passed away early in 1931.

Hermann Priesner (born 1891, Linz) studied zoology at the University of Graz, where he earned his doctorate in 1915. He then taught at the State Secondary School in Linz, publishing his findings on Hymenoptera during this period. In 1928, he moved to Egypt to work for the Royal Egyptian Ministry of Agriculture. After World War II and his internment, he briefly returned to teach at the Federal Secondary School in Linz before relocating to Egypt again in 1948. From 1951, he also taught at Fouad and Ibrahim Universities in Cairo. After his death, his collection was divided and distributed among several private individuals and museums.

Karl Kusdas (born 1900, Linz) joined the Austrian Federal Railways after graduating from high school in 1920. He began collecting butterflies at the age of 17 and also studied Trichoptera. Before the war, he chaired the Entomological Working Group and studied selected Hymenoptera families, focusing on bee genera *Bombus* and *Nomada*. After his death in 1974, his collection, except for the Pompilidae, was transferred to the Zoological State Collection in Munich.

Helmut Heinrich Hamann (born 1902, Prambachkirchen) studied for two semesters at the University of Natural Resources and Life Sciences after graduating from high school. He collected Hymenoptera before and during the war and inspired several entomologists to focus on Hymenoptera, including Karl Kusdas, Franz Koller, Maximilian Schwarz, Josef Gusenleitner, Josef Schmidt, and Andreas Ebmer. In 1952, he joined the Upper Austrian State Museum and moved to the Institute for the Study of Plant Diseases in Java in 1955, returning in 1962. He was awarded the title of professor in 1975 for his contributions. Parts of his collection, especially ants, were donated to the State Museum after his death in 1980.

Franz Koller (born 1909, Ottau in Bohemia) worked as a primary school teacher in Bohemia and, after the war and his imprisonment, in Linz from 1946. Although he had always been interested in insects, particularly beetles, he lacked like-minded contacts in his homeland. Through H.H. Hamann, he developed an interest in wild bees and published several papers on this group of insects. After his sudden death in 1977, significant parts of his collection were transferred to the Upper Austrian State Museum.

Josef Gusenleitner (born 1929, Linz) discovered his interest in natural sciences while attending high school. In 1946, he joined the Entomological Working Group and initially studied Heteroptera and Coleoptera. He studied zoology and botany at the University of Vienna, where he earned his doctorate in 1953. Professionally, he worked at the Agricultural-Chemical Federal Research Institute in Linz. From 1959 onwards, he focused on Hymenoptera and published numerous papers on the taxonomy and faunistics of Vespidae. Parts of his collection were transferred to the Upper Austrian State Museum.

Maximilian Schwarz (born 1934, Vienna) moved to Linz after World War II, where he completed his schooling. He began working as a machinist apprentice at Haas Food Factory, eventually becoming a workshop supervisor domestically and abroad. At 14, he met Hamann at an aquarium exhibition, who inspired his interest in Hymenoptera. Around 1960, Schwarz started focusing on parasitic bees and published several taxonomic and faunistic papers. Parts of his private collection are now housed at the Upper Austrian State Museum and in other private collections.

Andreas W. Ebmer (born 1941, Linz) graduated from Wilhering Abbey High School in 1959 and joined the Cistercian Abbey there. After studying theology at the University of Innsbruck, he served as a chaplain in Bad Leonfelden and Gramatstetten before becoming the parish priest of Puchenau in 1969. He began collecting butterflies at 14 but switched to studying the bee genus *Halictus* upon Koller's recommendation. Members of the Entomological Working Group connected him with *Halictus* specialist Paul Blüthgen, leading to numerous taxonomic and faunistic publications in subsequent years.

Tab. S1 | Functional traits of wild bee species.

For each species a set of distinct ecological traits is shown. The trait data is coded binary, where 1 depicts a positive and 0 a negative association to this trait. For parasitic species other life cycle traits than "Life-Cycle: Parasitic" are indexed with NA as these traits do not apply to these species. The trait abbreviations are as follows: "Life-Cycle: Solitary" refers to species that nest individually, without forming colonies. These bees do not exhibit social behaviours and each female typically creates and provisions her own nest. "Life-Cycle: Social" denotes species that adopt various degrees of social nesting strategy, living and working in colonies where tasks are divided among different individuals. "Life-Cycle: Parasitic" describes species that do not gather pollen themselves. Instead, these bees, often called cuckoo-bees, lay their eggs in the nests of other bee species, relying on the host bees to provision their offspring. "Pollen: Oligophagous" indicates species that have a specialized diet, foraging exclusively on selected plant families or genera. "Pollen: Polyphagous" refers to species that are generalist foragers, not selective about the plant families or genera they visit. "H: Eurytopic/Pioneer" refers to species that are adaptable to a wide range of environmental conditions and habitats and are often early colonizers or associated with human-altered environments. "H: Edge/Margins" refers to species typically found at the edges or margins of habitats. "H: Open-Space" refers to species that prefer open landscapes, such as grasslands or open fields. "MiC: Broad" indicates species that tolerate a wide range of microclimatic conditions. "MiC: Cool" refers to species that prefer cool microclimates. "MiC: Moist" refers to species that usually thrive in moist microclimates. "MiC: Dry" refers to species that prefer dry microclimates. "MiC: Warm" refers to species that thrive in warm microclimates. "MaC: Undifferentiated" indicates species that are not specific to any particular large-scale (macro) climatic zone. "MaC: Atlantic" refers to species associated with the Atlantic macro climate. "MaC: European" refers to species associated with the general European climate. "MaC: Continental" refers to species associated with continental climates. "MaC: Mediterranean" refers to species associated with the Mediterranean climate.

| **species** | **Life-Cycle: Solitary** | **Life-Cycle: Social** | **Life-Cycle: Parasitic** | **Pollen: Oligophagous** | **Pollen: Polyphagous** | **MiC: Warm** | **MiC: Broad** | **MiC: Cool** | **MiC: Moist** | **MiC: Dry** | **MaC: Continental** | **MaC: Mediterranean** | **MaC: European** | **MaC: Undifferentiated** | **MaC: Atlantic** | **H: Eurytopic/Pioneer** | **H: Open-Space** | **H: Edge/Margins** |  |
| --- | --- | --- | --- | --- | --- | --- | --- | --- | --- | --- | --- | --- | --- | --- | --- | --- | --- | --- | --- |
| Andrena agilissima | 1 | 0 | 0 | 1 | 0 | 1 | 0 | 0 | 0 | 0 | 0 | 0 | 0 | 1 | 0 | 0 | 1 | 0 |  |
| Andrena alfkenella | 1 | 0 | 0 | 0 | 1 | 1 | 0 | 0 | 0 | 1 | 0 | 0 | 1 | 0 | 0 | 0 | 1 | 0 |  |
| Andrena apicata | 1 | 0 | 0 | 1 | 0 | 1 | 0 | 0 | 0 | 0 | 0 | 0 | 0 | 0 | 1 | 0 | 0 | 1 |  |
| Andrena argentata | 1 | 0 | 0 | 0 | 1 | 1 | 0 | 0 | 0 | 1 | 0 | 0 | 0 | 1 | 0 | 0 | 1 | 0 |  |
| Andrena barbareae | 1 | 0 | 0 | 0 | 1 |  |  |  |  |  |  |  |  |  |  | 0 | 1 | 0 |  |
| Andrena barbilabris | 1 | 0 | 0 | 0 | 1 | 1 | 0 | 0 | 0 | 1 | 0 | 0 | 0 | 1 | 0 | 0 | 1 | 0 |  |
| Andrena bicolor | 1 | 0 | 0 | 0 | 1 | 0 | 1 | 0 | 0 | 0 | 0 | 0 | 0 | 1 | 0 | 1 | 0 | 0 |  |
| Andrena bimaculata | 1 | 0 | 0 | 0 | 1 | 1 | 0 | 0 | 0 | 0 | 0 | 0 | 0 | 1 | 0 | 0 | 1 | 0 |  |
| Andrena bucephala | 1 | 0 | 0 | 0 | 1 | 1 | 0 | 0 | 0 | 0 | 0 | 0 | 0 | 0 | 1 | 0 | 0 | 1 |  |
| Andrena carantonica | 1 | 0 | 0 | 0 | 1 | 1 | 0 | 0 | 0 | 1 | 0 | 0 | 0 | 0 | 1 | 0 | 1 | 0 |  |
| Andrena chrysosceles | 1 | 0 | 0 | 0 | 1 | 1 | 0 | 0 | 0 | 0 | 0 | 0 | 0 | 0 | 1 | 0 | 0 | 1 |  |
| Andrena cineraria | 1 | 0 | 0 | 0 | 1 | 1 | 0 | 0 | 0 | 0 | 0 | 0 | 0 | 1 | 0 | 0 | 0 | 1 |  |
| Andrena clarkella | 1 | 0 | 0 | 1 | 0 | 1 | 0 | 0 | 0 | 0 | 0 | 0 | 0 | 1 | 0 | 0 | 0 | 1 |  |
| Andrena coitana | 1 | 0 | 0 | 0 | 1 | 0 | 0 | 1 | 1 | 0 | 0 | 0 | 0 | 1 | 0 | 0 | 0 | 1 |  |
| Andrena combinata | 1 | 0 | 0 | 0 | 1 | 1 | 0 | 0 | 0 | 1 | 0 | 0 | 0 | 1 | 0 | 0 | 1 | 0 |  |
| Andrena congruens | 1 | 0 | 0 | 0 | 1 | 1 | 0 | 0 | 1 | 0 | 0 | 0 | 0 | 1 | 0 | 0 | 1 | 0 |  |
| Andrena curvungula | 1 | 0 | 0 | 1 | 0 | 1 | 0 | 0 | 0 | 1 | 0 | 0 | 0 | 1 | 0 | 0 | 1 | 0 |  |
| Andrena denticulata | 1 | 0 | 0 | 1 | 0 | 1 | 0 | 0 | 0 | 0 | 0 | 0 | 0 | 1 | 0 | 0 | 1 | 0 |  |
| Andrena dorsata | 1 | 0 | 0 | 0 | 1 | 1 | 0 | 0 | 0 | 0 | 0 | 0 | 0 | 0 | 1 | 0 | 1 | 0 |  |
| Andrena falsifica | 1 | 0 | 0 | 0 | 1 | 1 | 0 | 0 | 0 | 0 | 0 | 0 | 0 | 0 | 1 | 0 | 0 | 1 |  |
| Andrena ferox | 1 | 0 | 0 | 0 | 1 | 1 | 0 | 0 | 0 | 0 | 0 | 0 | 0 | 0 | 1 | 0 | 0 | 1 |  |
| Andrena flavipes | 1 | 0 | 0 | 0 | 1 | 0 | 1 | 0 | 0 | 0 | 0 | 0 | 0 | 1 | 0 | 1 | 0 | 0 |  |
| Andrena florea | 1 | 0 | 0 | 1 | 0 | 1 | 0 | 0 | 0 | 0 | 0 | 0 | 0 | 1 | 0 | 0 | 0 | 1 |  |
| Andrena floricola | 1 | 0 | 0 | 1 | 0 | 1 | 0 | 0 | 0 | 1 | 0 | 0 | 0 | 1 | 0 | 0 | 1 | 0 |  |
| Andrena fucata | 1 | 0 | 0 | 0 | 1 | 1 | 0 | 0 | 0 | 0 | 0 | 0 | 0 | 0 | 1 | 0 | 0 | 1 |  |
| Andrena fulva | 1 | 0 | 0 | 0 | 1 | 1 | 0 | 0 | 0 | 0 | 0 | 0 | 1 | 0 | 0 | 1 | 0 | 0 |  |
| Andrena fulvago | 1 | 0 | 0 | 1 | 0 | 1 | 0 | 0 | 0 | 0 | 0 | 0 | 0 | 1 | 0 | 0 | 0 | 1 |  |
| Andrena fulvata | 1 | 0 | 0 | 0 | 1 | 1 | 0 | 0 | 0 | 0 | 0 | 0 | 1 | 0 | 0 | 0 | 0 | 1 |  |
| Andrena fulvida | 1 | 0 | 0 | 0 | 1 | 1 | 0 | 0 | 0 | 0 | 0 | 0 | 0 | 0 | 0 | 0 | 0 | 1 |  |
| Andrena gelriae | 1 | 0 | 0 | 1 | 0 | 1 | 0 | 0 | 0 | 1 | 0 | 0 | 0 | 1 | 0 | 0 | 1 | 0 |  |
| Andrena gravida | 1 | 0 | 0 | 0 | 1 | 0 | 1 | 0 | 0 | 0 | 0 | 0 | 0 | 0 | 1 | 1 | 0 | 0 |  |
| Andrena haemorrhoa | 1 | 0 | 0 | 0 | 1 | 0 | 1 | 0 | 0 | 0 | 0 | 0 | 0 | 1 | 0 | 1 | 0 | 0 |  |
| Andrena hattorfiana | 1 | 0 | 0 | 1 | 0 | 1 | 0 | 0 | 0 | 1 | 0 | 0 | 0 | 1 | 0 | 0 | 1 | 0 |  |
| Andrena helvola | 1 | 0 | 0 | 0 | 1 | 1 | 0 | 0 | 0 | 0 | 0 | 0 | 0 | 0 | 1 | 0 | 0 | 1 |  |
| Andrena humilis | 1 | 0 | 0 | 1 | 0 | 1 | 0 | 0 | 0 | 0 | 0 | 0 | 0 | 1 | 0 | 0 | 0 | 1 |  |
| Andrena labialis | 1 | 0 | 0 | 1 | 0 | 1 | 0 | 0 | 0 | 1 | 0 | 0 | 0 | 1 | 0 | 0 | 1 | 0 |  |
| Andrena labiata | 1 | 0 | 0 | 0 | 1 | 1 | 0 | 0 | 0 | 0 | 0 | 0 | 0 | 1 | 0 | 0 | 1 | 0 |  |
| Andrena lagopus | 1 | 0 | 0 | 1 | 0 | 1 | 0 | 0 | 0 | 1 | 0 | 1 | 0 | 0 | 0 | 0 | 1 | 0 |  |
| Andrena lathyri | 1 | 0 | 0 | 1 | 0 | 1 | 0 | 0 | 0 | 1 | 0 | 0 | 0 | 1 | 0 | 0 | 1 | 0 |  |
| Andrena limata | 1 | 0 | 0 | 0 | 1 | 1 | 0 | 0 | 0 | 1 | 0 | 0 | 0 | 1 | 0 | 0 | 1 | 0 |  |
| Andrena marginata | 1 | 0 | 0 | 1 | 0 | 1 | 0 | 0 | 0 | 0 | 0 | 0 | 0 | 1 | 0 | 0 | 1 | 0 |  |
| Andrena minutula | 1 | 0 | 0 | 0 | 1 | 0 | 1 | 0 | 0 | 0 | 0 | 0 | 0 | 1 | 0 | 1 | 0 | 0 |  |
| Andrena minutuloides | 1 | 0 | 0 | 0 | 1 | 0 | 1 | 0 | 0 | 0 | 0 | 0 | 0 | 1 | 0 | 1 | 0 | 0 |  |
| Andrena mitis | 1 | 0 | 0 | 1 | 0 | 1 | 0 | 0 | 1 | 0 | 0 | 0 | 1 | 0 | 0 | 0 | 0 | 1 |  |
| Andrena nana | 1 | 0 | 0 | 0 | 1 | 1 | 0 | 0 | 0 | 1 | 0 | 0 | 0 | 1 | 0 | 0 | 1 | 0 |  |
| Andrena nigroaenea | 1 | 0 | 0 | 0 | 1 | 1 | 0 | 0 | 0 | 0 | 0 | 0 | 0 | 1 | 0 | 0 | 0 | 1 |  |
| Andrena nigrospina | 1 | 0 | 0 | 0 | 1 | 1 | 0 | 0 | 0 | 1 |  |  |  |  |  | 0 | 1 | 0 |  |
| Andrena nitida | 1 | 0 | 0 | 0 | 1 | 0 | 1 | 0 | 0 | 0 | 0 | 0 | 0 | 1 | 0 | 1 | 0 | 0 |  |
| Andrena nitidiuscula | 1 | 0 | 0 | 1 | 0 | 1 | 0 | 0 | 0 | 1 | 0 | 0 | 0 | 1 | 0 | 0 | 0 | 1 |  |
| Andrena niveata | 1 | 0 | 0 | 1 | 0 | 1 | 0 | 0 | 0 | 1 | 0 | 0 | 0 | 1 | 0 | 0 | 1 | 0 |  |
| Andrena nycthemera | 1 | 0 | 0 | 1 | 0 | 1 | 0 | 0 | 0 | 0 | 0 | 0 | 0 | 0 | 1 | 0 | 0 | 1 |  |
| Andrena ovatula | 1 | 0 | 0 | 0 | 1 | 1 | 0 | 0 | 0 | 1 | 0 | 0 | 0 | 1 | 0 | 0 | 1 | 0 |  |
| Andrena pandellei | 1 | 0 | 0 | 1 | 0 | 1 | 0 | 0 | 0 | 1 | 0 | 0 | 0 | 1 | 0 | 0 | 1 | 0 |  |
| Andrena polita | 1 | 0 | 0 | 1 | 0 | 1 | 0 | 0 | 0 | 1 | 0 | 0 | 0 | 0 | 1 | 0 | 1 | 0 |  |
| Andrena pontica | 1 | 0 | 0 | 1 | 0 | 1 | 0 | 0 | 0 | 0 | 0 | 0 | 1 | 0 | 0 | 0 | 0 | 1 |  |
| Andrena potentillae | 1 | 0 | 0 | 1 | 0 | 1 | 0 | 0 | 0 | 1 | 0 | 0 | 0 | 0 | 1 | 0 | 1 | 0 |  |
| Andrena praecox | 1 | 0 | 0 | 1 | 0 | 1 | 0 | 0 | 0 | 0 | 0 | 0 | 0 | 0 | 1 | 0 | 0 | 1 |  |
| Andrena propinqua | 1 | 0 | 0 | 0 | 1 | 1 | 0 | 0 | 0 | 0 | 0 | 0 | 0 | 1 | 0 | 0 | 1 | 0 |  |
| Andrena proxima | 1 | 0 | 0 | 1 | 0 | 1 | 0 | 0 | 0 | 1 | 0 | 0 | 0 | 1 | 0 | 0 | 1 | 0 |  |
| Andrena pusilla | 1 | 0 | 0 | 1 | 0 | 1 | 0 | 0 | 0 | 1 | 0 | 0 | 1 | 0 | 0 | 0 | 1 | 0 |  |
| Andrena rosae | 1 | 0 | 0 | 0 | 1 | 1 | 0 | 0 | 0 | 0 | 0 | 0 | 0 | 1 | 0 | 0 | 1 | 0 |  |
| Andrena ruficrus | 1 | 0 | 0 | 1 | 0 | 1 | 0 | 0 | 1 | 0 | 0 | 0 | 0 | 0 | 0 | 0 | 0 | 1 |  |
| Andrena schencki | 1 | 0 | 0 | 0 | 1 | 1 | 0 | 0 | 0 | 1 | 0 | 0 | 0 | 1 | 0 | 0 | 1 | 0 |  |
| Andrena similis | 1 | 0 | 0 | 1 | 0 | 1 | 0 | 0 | 0 | 1 | 0 | 0 | 0 | 1 | 0 | 0 | 1 | 0 |  |
| Andrena simillima | 1 | 0 | 0 | 0 | 1 | 1 | 0 | 0 | 0 | 1 | 0 | 0 | 0 | 0 | 1 | 0 | 1 | 0 |  |
| Andrena simontornyella | 1 | 0 | 0 | 0 | 1 | 1 | 0 | 0 | 0 | 1 | 0 | 1 | 0 | 0 | 0 | 0 | 1 | 0 |  |
| Andrena strohmella | 1 | 0 | 0 | 0 | 1 | 1 | 0 | 0 | 0 | 1 | 0 | 0 | 1 | 0 | 0 | 0 | 0 | 1 |  |
| Andrena subopaca | 1 | 0 | 0 | 0 | 1 | 1 | 0 | 0 | 0 | 0 | 0 | 0 | 0 | 1 | 0 | 0 | 0 | 1 |  |
| Andrena susterai | 1 | 0 | 0 | 0 | 1 | 1 | 0 | 0 | 0 | 1 | 0 | 0 | 1 | 0 | 0 | 0 | 1 | 0 |  |
| Andrena symphyti | 1 | 0 | 0 | 1 | 0 | 0 | 0 | 1 | 1 | 0 | 1 | 0 | 0 | 0 | 0 | 0 | 0 | 1 |  |
| Andrena taraxaci | 1 | 0 | 0 | 1 | 0 | 1 | 0 | 0 | 0 | 0 | 1 | 0 | 0 | 0 | 0 | 0 | 1 | 0 |  |
| Andrena tibialis | 1 | 0 | 0 | 0 | 1 | 1 | 0 | 0 | 0 | 0 | 0 | 0 | 0 | 1 | 0 | 0 | 1 | 0 |  |
| Andrena trimmerana | 1 | 0 | 0 | 0 | 1 | 1 | 0 | 0 | 0 | 1 | 0 | 0 | 0 | 1 | 0 | 0 | 1 | 0 |  |
| Andrena vaga | 1 | 0 | 0 | 1 | 0 | 1 | 0 | 0 | 0 | 0 | 0 | 0 | 0 | 1 | 0 | 0 | 0 | 1 |  |
| Andrena varians | 1 | 0 | 0 | 0 | 1 | 1 | 0 | 0 | 0 | 0 | 0 | 0 | 0 | 0 | 1 | 0 | 0 | 1 |  |
| Andrena ventralis | 1 | 0 | 0 | 1 | 0 | 1 | 0 | 0 | 0 | 0 | 0 | 0 | 0 | 1 | 0 | 0 | 0 | 1 |  |
| Andrena viridescens | 1 | 0 | 0 | 1 | 0 | 1 | 0 | 0 | 0 | 0 | 0 | 0 | 0 | 0 | 1 | 0 | 1 | 0 |  |
| Andrena wilkella | 1 | 0 | 0 | 1 | 0 | 1 | 0 | 0 | 0 | 0 | 0 | 0 | 0 | 1 | 0 | 0 | 1 | 0 |  |
| Anthidiellum strigatum | 1 | 0 | 0 | 0 | 1 | 1 | 0 | 0 | 0 | 0 | 0 | 0 | 0 | 1 | 0 | 0 | 0 | 1 |  |
| Anthidium manicatum | 1 | 0 | 0 | 0 | 1 | 0 | 1 | 0 | 0 | 0 | 0 | 0 | 0 | 1 | 0 | 1 | 0 | 0 |  |
| Anthidium oblongatum | 1 | 0 | 0 | 0 | 1 | 1 | 0 | 0 | 0 | 1 | 0 | 0 | 0 | 1 | 0 | 0 | 1 | 0 |  |
| Anthidium punctatum | 1 | 0 | 0 | 0 | 1 | 1 | 0 | 0 | 0 | 1 | 0 | 0 | 0 | 1 | 0 | 0 | 1 | 0 |  |
| Anthophora aestivalis | 1 | 0 | 0 | 0 | 1 | 0 | 1 | 0 | 0 | 0 | 0 | 0 | 0 | 1 | 0 | 0 | 1 | 0 |  |
| Anthophora bimaculata | 1 | 0 | 0 | 0 | 1 | 1 | 0 | 0 | 0 | 1 | 0 | 0 | 0 | 1 | 0 | 0 | 1 | 0 |  |
| Anthophora crinipes | 1 | 0 | 0 | 0 | 1 | 1 | 0 | 0 | 0 | 1 | 0 | 1 | 0 | 0 | 0 | 1 | 0 | 0 |  |
| Anthophora furcata | 1 | 0 | 0 | 1 | 0 | 0 | 0 | 1 | 0 | 0 | 0 | 0 | 0 | 1 | 0 | 0 | 0 | 1 |  |
| Anthophora plagiata | 1 | 0 | 0 | 0 | 1 | 0 | 0 | 1 | 0 | 0 | 0 | 0 | 0 | 1 | 0 | 0 | 1 | 0 |  |
| Anthophora plumipes | 1 | 0 | 0 | 0 | 1 | 0 | 1 | 0 | 0 | 0 | 0 | 0 | 0 | 1 | 0 | 1 | 0 | 0 |  |
| Anthophora quadrimaculata | 1 | 0 | 0 | 0 | 1 | 1 | 0 | 0 | 0 | 1 | 0 | 0 | 0 | 1 | 0 | 0 | 1 | 0 |  |
| Anthophora retusa | 1 | 0 | 0 | 0 | 1 | 1 | 0 | 0 | 0 | 0 | 1 | 0 | 0 | 0 | 0 | 0 | 1 | 0 |  |
| Biastes emarginatus |  |  | 1 |  |  | 1 | 0 | 0 | 0 | 1 | 0 | 1 | 0 | 0 | 0 | 0 | 1 | 0 |  |
| Biastes truncatus |  |  | 1 |  |  | 0 | 0 | 1 | 0 | 0 | 0 | 0 | 0 | 0 | 0 | 0 | 1 | 0 |  |
| Bombus barbutellus |  |  | 1 |  |  | 0 | 1 | 0 | 0 | 0 | 0 | 0 | 0 | 1 | 0 | 0 | 1 | 0 |  |
| Bombus bohemicus |  |  | 1 |  |  | 0 | 1 | 0 | 0 | 0 | 0 | 0 | 0 | 1 | 0 | 1 | 0 | 0 |  |
| Bombus campestris |  |  | 1 |  |  | 0 | 1 | 0 | 0 | 0 | 0 | 0 | 0 | 1 | 0 | 0 | 1 | 0 |  |
| Bombus hortorum | 0 | 1 | 0 | 0 | 1 | 0 | 1 | 0 | 0 | 0 | 0 | 0 | 0 | 1 | 0 | 0 | 0 | 0 |  |
| Bombus humilis | 0 | 1 | 0 | 0 | 1 | 1 | 0 | 0 | 0 | 0 | 0 | 0 | 1 | 0 | 0 | 0 | 0 | 1 |  |
| Bombus hypnorum | 0 | 1 | 0 | 0 | 1 | 0 | 0 | 1 | 0 | 0 | 0 | 0 | 0 | 0 | 0 | 0 | 0 | 0 |  |
| Bombus lapidarius | 0 | 1 | 0 | 0 | 1 | 0 | 1 | 0 | 0 | 0 | 0 | 0 | 0 | 1 | 0 | 0 | 0 | 1 |  |
| Bombus muscorum | 0 | 1 | 0 | 0 | 1 | 0 | 0 | 0 | 1 | 0 | 0 | 0 | 0 | 1 | 0 | 0 | 1 | 0 |  |
| Bombus pascuorum | 0 | 1 | 0 | 0 | 1 | 0 | 1 | 0 | 0 | 0 | 0 | 0 | 0 | 1 | 0 | 0 | 0 | 1 |  |
| Bombus pomorum | 0 | 1 | 0 | 0 | 1 | 1 | 0 | 0 | 0 | 0 | 1 | 0 | 0 | 0 | 0 | 0 | 0 | 1 |  |
| Bombus pratorum | 0 | 1 | 0 | 0 | 1 | 0 | 1 | 0 | 0 | 0 | 0 | 0 | 0 | 1 | 0 | 0 | 0 | 0 |  |
| Bombus ruderarius | 0 | 1 | 0 | 0 | 1 | 0 | 1 | 0 | 0 | 0 | 1 | 0 | 0 | 0 | 0 | 0 | 1 | 0 |  |
| Bombus rupestris |  |  | 1 |  |  | 0 | 1 | 0 | 0 | 0 | 0 | 0 | 0 | 1 | 0 | 0 | 0 | 1 |  |
| Bombus soroeensis | 0 | 1 | 0 | 0 | 1 | 0 | 1 | 0 | 0 | 0 | 0 | 0 | 0 | 1 | 0 | 0 | 1 | 0 |  |
| Bombus sylvarum | 0 | 1 | 0 | 0 | 1 | 1 | 0 | 0 | 0 | 0 | 1 | 0 | 0 | 0 | 0 | 0 | 1 | 0 |  |
| Bombus sylvestris |  |  | 1 |  |  | 0 | 1 | 0 | 0 | 0 | 0 | 0 | 0 | 1 | 0 | 0 | 0 | 0 |  |
| Ceratina chalybea | 1 | 0 | 0 | 0 | 1 | 1 | 0 | 0 | 0 | 1 | 0 | 1 | 0 | 0 | 0 | 0 | 1 | 0 |  |
| Ceratina cyanea | 1 | 0 | 0 | 0 | 1 | 0 | 1 | 0 | 0 | 0 | 0 | 0 | 0 | 1 | 0 | 0 | 0 | 1 |  |
| Chelostoma campanularum | 1 | 0 | 0 | 1 | 0 | 0 | 0 | 1 | 0 | 0 | 0 | 0 | 0 | 1 | 0 | 0 | 0 | 1 |  |
| Chelostoma distinctum | 1 | 0 | 0 | 1 | 0 | 0 | 0 | 1 | 0 | 0 | 0 | 0 | 0 | 1 | 0 | 0 | 0 | 1 |  |
| Chelostoma emarginatum | 1 | 0 | 0 | 1 | 0 | 1 | 0 | 0 | 1 | 0 | 0 | 1 | 0 | 0 | 0 | 0 | 0 | 1 |  |
| Chelostoma florisomne | 1 | 0 | 0 | 1 | 0 | 0 | 1 | 0 | 0 | 0 | 0 | 0 | 0 | 1 | 0 | 0 | 0 | 1 |  |
| Chelostoma rapunculi | 1 | 0 | 0 | 1 | 0 | 0 | 1 | 0 | 0 | 0 | 0 | 0 | 0 | 0 | 0 | 0 | 0 | 1 |  |
| Coelioxys afra |  |  | 1 |  |  | 1 | 0 | 0 | 0 | 1 | 0 | 1 | 0 | 0 | 0 | 0 | 1 | 0 |  |
| Coelioxys aurolimbata |  |  | 1 |  |  | 0 | 1 | 0 | 0 | 0 | 0 | 0 | 0 | 1 | 0 |  |  |  |  |
| Coelioxys inermis |  |  | 1 |  |  | 0 | 0 | 1 | 0 | 0 | 0 | 0 | 0 | 1 | 0 | 0 | 0 | 1 |  |
| Coelioxys mandibularis |  |  | 1 |  |  | 0 | 1 | 0 | 0 | 0 | 0 | 0 | 0 | 1 | 0 | 1 | 0 | 0 |  |
| Coelioxys quadridentata |  |  | 1 |  |  | 0 | 0 | 1 | 0 | 0 | 0 | 0 | 0 | 1 | 0 | 0 | 0 | 1 |  |
| Coelioxys rufescens |  |  | 1 |  |  | 0 | 0 | 1 | 0 | 0 | 0 | 0 | 0 | 1 | 0 | 0 | 0 | 1 |  |
| Colletes cunicularius | 1 | 0 | 0 | 0 | 1 | 0 | 1 | 0 | 0 | 0 | 0 | 0 | 0 | 1 | 0 | 0 | 1 | 0 |  |
| Colletes daviesanus | 1 | 0 | 0 | 1 | 0 | 1 | 0 | 0 | 0 | 0 | 0 | 0 | 0 | 1 | 0 | 0 | 1 | 0 |  |
| Colletes hederae | 1 | 0 | 0 | 1 | 0 | 0 | 1 | 0 | 0 | 0 | 0 | 0 | 1 | 0 | 0 | 1 | 0 | 0 |  |
| Colletes inexspectatus | 1 | 0 | 0 | 1 | 0 | 1 | 0 | 0 | 0 | 1 | 1 | 0 | 0 | 0 | 0 | 0 | 1 | 0 |  |
| Colletes similis | 1 | 0 | 0 | 1 | 0 | 1 | 0 | 0 | 0 | 1 | 0 | 0 | 0 | 1 | 0 | 0 | 1 | 0 |  |
| Dasypoda hirtipes | 1 | 0 | 0 | 1 | 0 | 1 | 0 | 0 | 0 | 1 | 0 | 0 | 0 | 1 | 0 | 0 | 1 | 0 |  |
| Dufourea dentiventris | 1 | 0 | 0 | 1 | 0 | 1 | 0 | 0 | 0 | 0 | 0 | 0 | 0 | 1 | 0 | 0 | 0 | 1 |  |
| Dufourea halictula | 1 | 0 | 0 | 1 | 0 | 1 | 0 | 0 | 0 | 1 | 0 | 0 | 1 | 0 | 0 | 0 | 1 | 0 |  |
| Dufourea inermis | 1 | 0 | 0 | 1 | 0 | 1 | 0 | 0 | 0 | 0 | 0 | 0 | 0 | 1 | 0 | 0 | 0 | 1 |  |
| Epeolus cruciger |  |  | 1 |  |  | 1 | 0 | 0 | 0 | 0 | 0 | 0 | 0 | 1 | 0 | 0 | 1 | 0 |  |
| Epeolus variegatus |  |  | 1 |  |  | 1 | 0 | 0 | 0 | 0 | 0 | 0 | 0 | 1 | 0 | 0 | 1 | 0 |  |
| Eucera interrupta | 1 | 0 | 0 | 1 | 0 | 1 | 0 | 0 | 0 | 1 | 0 | 1 | 0 | 0 | 0 | 0 | 1 | 0 |  |
| Eucera longicornis | 1 | 0 | 0 | 1 | 0 | 1 | 0 | 0 | 0 | 1 | 0 | 0 | 0 | 1 | 0 | 0 | 1 | 0 |  |
| Eucera nigrescens | 1 | 0 | 0 | 1 | 0 | 0 | 1 | 0 | 0 | 0 | 0 | 0 | 0 | 1 | 0 | 0 | 1 | 0 |  |
| Halictus confusus | 1 | 0 | 0 | 0 | 1 | 0 | 1 | 0 | 0 | 0 | 0 | 0 | 0 | 0 | 1 | 0 | 1 | 0 |  |
| Halictus eurygnathus | 1 | 0 | 0 | 0 | 1 | 1 | 0 | 0 | 0 | 1 | 0 | 0 | 0 | 1 | 0 | 0 | 1 | 0 |  |
| Halictus kessleri | 0 | 1 | 0 | 0 | 1 | 1 | 0 | 0 | 0 | 1 | 1 | 0 | 0 | 0 | 0 | 0 | 1 | 0 |  |
| Halictus leucaheneus | 0 | 1 | 0 | 0 | 1 | 1 | 0 | 0 | 0 | 1 | 0 | 0 | 0 | 0 | 1 | 0 | 1 | 0 |  |
| Halictus maculatus | 0 | 1 | 0 | 0 | 1 | 1 | 0 | 0 | 0 | 0 | 0 | 0 | 0 | 1 | 0 | 0 | 1 | 0 |  |
| Halictus rubicundus | 0 | 1 | 0 | 0 | 1 | 0 | 1 | 0 | 0 | 0 | 0 | 0 | 0 | 1 | 0 | 1 | 0 | 0 |  |
| Halictus scabiosae | 0 | 1 | 0 | 0 | 1 | 1 | 0 | 0 | 0 | 1 | 0 | 0 | 0 | 1 | 0 | 0 | 1 | 0 |  |
| Halictus sexcinctus | 1 | 0 | 0 | 0 | 1 | 1 | 0 | 0 | 0 | 1 | 0 | 0 | 0 | 1 | 0 | 0 | 1 | 0 |  |
| Halictus simplex | 1 | 0 | 0 | 0 | 1 | 1 | 0 | 0 | 0 | 1 | 0 | 0 | 0 | 1 | 0 | 0 | 1 | 0 |  |
| Halictus subauratus | 0 | 1 | 0 | 0 | 1 | 1 | 0 | 0 | 0 | 1 | 0 | 0 | 0 | 1 | 0 | 1 | 0 | 0 |  |
| Halictus tumulorum | 0 | 1 | 0 | 0 | 1 | 0 | 1 | 0 | 0 | 0 | 0 | 0 | 0 | 1 | 0 | 1 | 0 | 0 |  |
| Heriades crenulatus | 1 | 0 | 0 | 1 | 0 | 1 | 0 | 0 | 0 | 0 | 0 | 1 | 0 | 0 | 0 | 0 | 0 | 1 |  |
| Heriades truncorum | 1 | 0 | 0 | 1 | 0 | 0 | 1 | 0 | 0 | 0 | 0 | 0 | 0 | 1 | 0 | 0 | 0 | 1 |  |
| Hoplitis adunca | 1 | 0 | 0 | 1 | 0 | 1 | 0 | 0 | 0 | 0 | 0 | 0 | 0 | 1 | 0 | 0 | 1 | 0 |  |
| Hoplitis anthocopoides | 1 | 0 | 0 | 1 | 0 | 1 | 0 | 0 | 0 | 0 | 0 | 1 | 0 | 0 | 0 | 0 | 1 | 0 |  |
| Hoplitis leucomelana | 1 | 0 | 0 | 0 | 1 | 0 | 1 | 0 | 0 | 0 | 0 | 0 | 0 | 1 | 0 | 0 | 0 | 1 |  |
| Hoplitis mitis | 1 | 0 | 0 | 1 | 0 | 1 | 0 | 0 | 0 | 0 | 0 | 0 | 0 | 1 | 0 | 0 | 0 | 1 |  |
| Hoplitis ravouxi | 1 | 0 | 0 | 0 | 1 | 1 | 0 | 0 | 0 | 1 | 0 | 1 | 0 | 0 | 0 | 0 | 1 | 0 |  |
| Hoplitis rufohirta | 1 | 0 | 0 | 0 | 1 | 1 | 0 | 0 | 0 | 1 | 0 | 1 | 0 | 0 | 0 | 0 | 1 | 0 |  |
| Hylaeus brevicornis | 1 | 0 | 0 | 0 | 1 | 0 | 1 | 0 | 0 | 0 | 0 | 0 | 0 | 1 | 0 | 1 | 0 | 0 |  |
| Hylaeus communis | 1 | 0 | 0 | 0 | 1 | 0 | 1 | 0 | 0 | 0 | 0 | 0 | 0 | 1 | 0 | 1 | 0 | 0 |  |
| Hylaeus confusus | 1 | 0 | 0 | 0 | 1 | 0 | 0 | 1 | 0 | 0 | 0 | 0 | 0 | 1 | 0 | 0 | 0 | 1 |  |
| Hylaeus cornutus | 1 | 0 | 0 | 0 | 1 | 1 | 0 | 0 | 0 | 1 | 0 | 0 | 0 | 1 | 0 | 0 | 1 | 0 |  |
| Hylaeus difformis | 1 | 0 | 0 | 0 | 1 | 0 | 0 | 1 | 0 | 0 | 0 | 0 | 0 | 1 | 0 | 0 | 0 | 1 |  |
| Hylaeus dilatatus | 1 | 0 | 0 | 0 | 1 | 1 | 0 | 0 | 0 | 0 | 0 | 0 | 0 | 1 | 0 | 0 | 1 | 0 |  |
| Hylaeus gibbus | 1 | 0 | 0 | 0 | 1 | 1 | 0 | 0 | 0 | 1 | 0 | 0 | 0 | 1 | 0 | 0 | 1 | 0 |  |
| Hylaeus gracilicornis | 1 | 0 | 0 | 0 | 1 | 0 | 0 | 1 | 1 | 0 | 0 | 0 | 0 | 1 | 0 | 0 | 0 | 1 |  |
| Hylaeus gredleri | 1 | 0 | 0 | 0 | 1 | 0 | 0 | 0 | 1 | 0 | 0 | 0 | 0 | 1 | 0 | 0 | 0 | 1 |  |
| Hylaeus hyalinatus | 1 | 0 | 0 | 0 | 1 | 0 | 1 | 0 | 0 | 0 | 0 | 0 | 1 | 0 | 0 | 1 | 0 | 0 |  |
| Hylaeus leptocephalus | 1 | 0 | 0 | 0 | 1 | 1 | 0 | 0 | 0 | 0 | 0 | 0 | 0 | 1 | 0 | 0 | 0 | 1 |  |
| Hylaeus nigritus | 1 | 0 | 0 | 1 | 0 | 1 | 0 | 0 | 0 | 0 | 0 | 0 | 0 | 1 | 0 | 0 | 1 | 0 |  |
| Hylaeus pictipes | 1 | 0 | 0 | 0 | 1 | 0 | 0 | 0 | 1 | 0 |  |  |  |  |  | 0 | 0 | 1 |  |
| Hylaeus punctatus | 1 | 0 | 0 | 0 | 1 | 1 | 0 | 0 | 0 | 1 | 0 | 1 | 0 | 0 | 0 | 0 | 1 | 0 |  |
| Hylaeus rinki | 1 | 0 | 0 | 0 | 1 | 0 | 0 | 0 | 1 | 0 | 0 | 0 | 0 | 0 | 0 | 0 | 0 | 1 |  |
| Hylaeus signatus | 1 | 0 | 0 | 1 | 0 | 1 | 0 | 0 | 0 | 0 | 0 | 0 | 0 | 1 | 0 | 0 | 1 | 0 |  |
| Hylaeus sinuatus | 1 | 0 | 0 | 0 | 1 | 0 | 0 | 1 | 0 | 0 | 1 | 0 | 0 | 0 | 0 | 0 | 0 | 1 |  |
| Hylaeus styriacus | 1 | 0 | 0 | 0 | 1 | 0 | 0 | 1 | 0 | 0 | 0 | 0 | 1 | 0 | 0 | 0 | 0 | 1 |  |
| Hylaeus tyrolensis | 1 | 0 | 0 | 0 | 1 |  |  |  |  |  | 0 | 0 | 1 | 0 | 0 |  |  |  |  |
| Hylaeus variegatus | 1 | 0 | 0 | 0 | 1 | 1 | 0 | 0 | 0 | 1 | 0 | 0 | 0 | 1 | 0 | 0 | 1 | 0 |  |
| Lasioglossum aeratum | 0 | 1 | 0 | 0 | 1 | 1 | 0 | 0 | 0 | 1 | 0 | 0 | 0 | 1 | 0 | 0 | 1 | 0 |  |
| Lasioglossum albipes | 0 | 1 | 0 | 0 | 1 | 1 | 0 | 0 | 0 | 0 | 0 | 0 | 0 | 1 | 0 | 0 | 0 | 1 |  |
| Lasioglossum bluethgeni |  |  | 0 | 0 | 1 | 1 | 0 | 0 | 1 | 0 | 0 | 0 | 1 | 0 | 0 | 0 | 0 | 1 |  |
| Lasioglossum calceatum | 0 | 1 | 0 | 0 | 1 | 0 | 1 | 0 | 0 | 0 | 0 | 0 | 0 | 1 | 0 | 1 | 0 | 0 |  |
| Lasioglossum clypeare | 1 | 0 | 0 | 0 | 1 | 1 | 0 | 0 | 0 | 1 | 1 | 0 | 0 | 0 | 0 | 0 | 1 | 0 |  |
| Lasioglossum convexiusculum | 1 | 0 | 0 | 0 | 1 | 1 | 0 | 0 | 0 | 1 | 0 | 0 | 0 | 1 | 0 | 0 | 1 | 0 |  |
| Lasioglossum costulatum | 1 | 0 | 0 | 1 | 0 | 1 | 0 | 0 | 0 | 1 | 0 | 0 | 0 | 1 | 0 | 0 | 0 | 1 |  |
| Lasioglossum fulvicorne | 1 | 0 | 0 | 0 | 1 | 0 | 1 | 0 | 0 | 0 | 0 | 0 | 0 | 0 | 1 | 1 | 0 | 0 |  |
| Lasioglossum glabriusculum | 0 | 1 | 0 | 0 | 1 | 1 | 0 | 0 | 0 | 1 | 0 | 0 | 0 | 1 | 0 | 0 | 1 | 0 |  |
| Lasioglossum intermedium |  |  | 0 | 0 | 1 | 1 | 0 | 0 | 0 | 1 | 0 | 0 | 1 | 0 | 0 | 0 | 1 | 0 |  |
| Lasioglossum interruptum | 0 | 1 | 0 | 0 | 1 | 1 | 0 | 0 | 0 | 0 | 0 | 0 | 0 | 1 | 0 | 0 | 1 | 0 |  |
| Lasioglossum laeve | 1 | 0 | 0 | 0 | 1 | 1 | 0 | 0 | 0 | 1 | 0 | 0 | 0 | 1 | 0 | 0 | 1 | 0 |  |
| Lasioglossum laevigatum | 1 | 0 | 0 | 0 | 1 | 1 | 0 | 0 | 0 | 0 | 0 | 0 | 0 | 1 | 0 | 0 | 0 | 1 |  |
| Lasioglossum laticeps | 0 | 1 | 0 | 0 | 1 | 1 | 0 | 0 | 0 | 0 | 0 | 0 | 0 | 1 | 0 | 0 | 0 | 1 |  |
| Lasioglossum lativentre | 1 | 0 | 0 | 0 | 1 | 1 | 0 | 0 | 0 | 0 | 0 | 0 | 0 | 1 | 0 | 0 | 0 | 1 |  |
| Lasioglossum leucopus |  |  | 0 | 0 | 1 | 0 | 0 | 1 | 0 | 0 | 0 | 0 | 0 | 0 | 1 | 0 | 0 | 1 |  |
| Lasioglossum leucozonium | 1 | 0 | 0 | 0 | 1 | 0 | 1 | 0 | 0 | 0 | 0 | 0 | 0 | 1 | 0 | 1 | 0 | 0 |  |
| Lasioglossum limbellum | 1 | 0 | 0 | 0 | 1 | 1 | 0 | 0 | 0 | 0 | 0 | 0 | 0 | 1 | 0 | 0 | 1 | 0 |  |
| Lasioglossum lineare | 0 | 1 | 0 | 0 | 1 | 1 | 0 | 0 | 0 | 1 | 1 | 0 | 0 | 0 | 0 | 0 | 1 | 0 |  |
| Lasioglossum lucidulum | 1 | 0 | 0 | 0 | 1 | 1 | 0 | 0 | 0 | 1 | 0 | 0 | 0 | 1 | 0 | 0 | 1 | 0 |  |
| Lasioglossum majus | 1 | 0 | 0 | 0 | 1 | 1 | 0 | 0 | 0 | 0 | 0 | 0 | 0 | 1 | 0 | 0 | 0 | 1 |  |
| Lasioglossum malachurum | 0 | 1 | 0 | 0 | 1 | 1 | 0 | 0 | 0 | 0 | 0 | 0 | 0 | 1 | 0 | 1 | 0 | 0 |  |
| Lasioglossum marginatum | 0 | 1 | 0 | 0 | 1 | 1 | 0 | 0 | 0 | 1 | 0 | 0 | 0 | 1 | 0 | 0 | 1 | 0 |  |
| Lasioglossum minutissimum | 1 | 0 | 0 | 0 | 1 | 1 | 0 | 0 | 0 | 0 | 0 | 0 | 0 | 1 | 0 | 0 | 1 | 0 |  |
| Lasioglossum minutulum | 1 | 0 | 0 | 0 | 1 | 1 | 0 | 0 | 1 | 0 | 0 | 0 | 1 | 0 | 0 | 0 | 1 | 0 |  |
| Lasioglossum monstrificum |  |  | 0 | 0 | 1 | 1 | 0 | 0 | 0 | 1 | 1 | 0 | 0 | 0 | 0 | 0 | 1 | 0 |  |
| Lasioglossum morio | 0 | 1 | 0 | 0 | 1 | 0 | 1 | 0 | 0 | 0 | 0 | 0 | 0 | 1 | 0 | 1 | 0 | 0 |  |
| Lasioglossum nigripes | 0 | 1 | 0 | 0 | 1 | 0 | 1 | 0 | 0 | 0 | 0 | 0 | 0 | 1 | 0 | 0 | 1 | 0 |  |
| Lasioglossum nitidiusculum | 1 | 0 | 0 | 0 | 1 | 0 | 1 | 0 | 0 | 0 | 0 | 0 | 0 | 1 | 0 | 1 | 0 | 0 |  |
| Lasioglossum nitidulum | 0 | 1 | 0 | 0 | 1 | 1 | 0 | 0 | 0 | 1 | 0 | 0 | 0 | 1 | 0 | 0 | 1 | 0 |  |
| Lasioglossum pallens | 1 | 0 | 0 | 0 | 1 | 1 | 0 | 0 | 0 | 1 | 0 | 0 | 0 | 1 | 0 | 0 | 0 | 1 |  |
| Lasioglossum parvulum | 1 | 0 | 0 | 0 | 1 | 0 | 1 | 0 | 0 | 0 | 0 | 0 | 0 | 1 | 0 | 0 | 1 | 0 |  |
| Lasioglossum pauxillum | 0 | 1 | 0 | 0 | 1 | 0 | 1 | 0 | 0 | 0 | 0 | 0 | 0 | 1 | 0 | 1 | 0 | 0 |  |
| Lasioglossum politum | 0 | 1 | 0 | 0 | 1 | 1 | 0 | 0 | 0 | 0 | 0 | 0 | 0 | 1 | 0 | 1 | 0 | 0 |  |
| Lasioglossum punctatissimum | 1 | 0 | 0 | 0 | 1 | 0 | 0 | 1 | 0 | 0 | 0 | 0 | 0 | 1 | 0 | 0 | 1 | 0 |  |
| Lasioglossum pygmaeum | 1 | 0 | 0 | 0 | 1 | 1 | 0 | 0 | 0 | 1 | 0 | 0 | 0 | 1 | 0 | 0 | 1 | 0 |  |
| Lasioglossum quadrinotatulum | 1 | 0 | 0 | 0 | 1 | 1 | 0 | 0 | 0 | 0 | 0 | 0 | 0 | 0 | 1 | 0 | 0 | 1 |  |
| Lasioglossum quadrinotatum | 1 | 0 | 0 | 0 | 1 | 1 | 0 | 0 | 0 | 1 | 0 | 0 | 0 | 1 | 0 | 0 | 1 | 0 |  |
| Lasioglossum rufitarse | 1 | 0 | 0 | 0 | 1 | 0 | 0 | 1 | 0 | 0 | 0 | 0 | 0 | 0 | 0 | 0 | 0 | 1 |  |
| Lasioglossum semilucens | 1 | 0 | 0 | 0 | 1 | 0 | 0 | 1 | 0 | 1 | 0 | 0 | 0 | 0 | 1 | 0 | 1 | 0 |  |
| Lasioglossum sexnotatum | 1 | 0 | 0 | 0 | 1 | 1 | 0 | 0 | 0 | 1 | 0 | 0 | 0 | 1 | 0 | 0 | 0 | 1 |  |
| Lasioglossum sexstrigatum |  |  | 0 | 0 | 1 | 1 | 0 | 0 | 0 | 0 | 0 | 0 | 0 | 0 | 1 | 0 | 1 | 0 |  |
| Lasioglossum subfasciatum |  |  | 0 | 0 | 1 | 1 | 0 | 0 | 0 | 0 | 0 | 0 | 0 | 1 | 0 | 0 | 0 | 1 |  |
| Lasioglossum villosulum | 1 | 0 | 0 | 0 | 1 | 0 | 1 | 0 | 0 | 0 | 0 | 0 | 0 | 1 | 0 | 1 | 0 | 0 |  |
| Lasioglossum xanthopus | 1 | 0 | 0 | 0 | 1 | 1 | 0 | 0 | 0 | 1 | 0 | 0 | 0 | 1 | 0 | 0 | 1 | 0 |  |
| Lasioglossum zonulum | 1 | 0 | 0 | 0 | 1 | 0 | 0 | 1 | 0 | 0 | 0 | 0 | 0 | 1 | 0 | 0 | 0 | 1 |  |
| Macropis europaea | 1 | 0 | 0 | 1 | 0 | 0 | 0 | 0 | 1 | 0 | 0 | 0 | 0 | 1 | 0 | 0 | 0 | 1 |  |
| Macropis fulvipes | 1 | 0 | 0 | 1 | 0 | 0 | 0 | 0 | 1 | 0 | 0 | 0 | 0 | 1 | 0 | 0 | 0 | 1 |  |
| Megachile alpicola | 1 | 0 | 0 | 0 | 1 | 0 | 0 | 1 | 0 | 0 | 0 | 0 | 0 | 0 | 0 | 0 | 0 | 1 |  |
| Megachile centuncularis | 1 | 0 | 0 | 0 | 1 | 0 | 0 | 1 | 0 | 0 | 0 | 0 | 0 | 1 | 0 | 0 | 0 | 1 |  |
| Megachile circumcincta | 1 | 0 | 0 | 0 | 1 | 0 | 1 | 0 | 0 | 0 | 0 | 0 | 0 | 1 | 0 | 0 | 0 | 1 |  |
| Megachile ericetorum | 1 | 0 | 0 | 1 | 0 | 0 | 1 | 0 | 0 | 0 | 0 | 0 | 0 | 1 | 0 | 1 | 0 | 0 |  |
| Megachile lagopoda | 1 | 0 | 0 | 0 | 1 | 1 | 0 | 0 | 0 | 1 | 0 | 0 | 0 | 1 | 0 | 0 | 1 | 0 |  |
| Megachile ligniseca | 1 | 0 | 0 | 0 | 1 | 0 | 0 | 1 | 1 | 0 | 0 | 0 | 0 | 0 | 0 | 0 | 0 | 1 |  |
| Megachile parietina | 1 | 0 | 0 | 0 | 1 | 1 | 0 | 0 | 0 | 1 | 0 | 1 | 0 | 0 | 0 | 0 | 1 | 0 |  |
| Megachile pilicrus | 1 | 0 | 0 | 1 | 0 | 1 | 0 | 0 | 0 | 1 | 0 | 1 | 0 | 0 | 0 | 0 | 1 | 0 |  |
| Megachile pilidens | 1 | 0 | 0 | 0 | 1 | 1 | 0 | 0 | 0 | 1 | 0 | 1 | 0 | 0 | 0 | 0 | 1 | 0 |  |
| Megachile rotundata | 1 | 0 | 0 | 0 | 1 | 0 | 1 | 0 | 0 | 0 | 0 | 0 | 0 | 1 | 0 | 1 | 0 | 0 |  |
| Megachile versicolor | 1 | 0 | 0 | 0 | 1 | 1 | 0 | 0 | 0 | 1 | 0 | 0 | 0 | 1 | 0 | 1 | 0 | 0 |  |
| Melecta albifrons |  |  | 1 |  |  | 0 | 1 | 0 | 0 | 0 | 0 | 0 | 0 | 1 | 0 | 0 | 1 | 0 |  |
| Melecta luctuosa |  |  | 1 |  |  | 0 | 1 | 0 | 0 | 0 | 0 | 0 | 0 | 1 | 0 | 0 | 0 | 1 |  |
| Melitta haemorrhoidalis | 1 | 0 | 0 | 1 | 0 | 1 | 0 | 0 | 0 | 0 | 0 | 0 | 0 | 1 | 0 | 0 | 0 | 1 |  |
| Melitta leporina | 1 | 0 | 0 | 1 | 0 | 0 | 1 | 0 | 0 | 0 | 0 | 0 | 0 | 1 | 0 | 0 | 1 | 0 |  |
| Melitta nigricans | 1 | 0 | 0 | 1 | 0 | 0 | 0 | 0 | 1 | 0 | 0 | 0 | 0 | 1 | 0 | 0 | 1 | 0 |  |
| Melitta tricincta | 1 | 0 | 0 | 1 | 0 | 1 | 0 | 0 | 0 | 0 | 1 | 0 | 0 | 0 | 0 | 0 | 1 | 0 |  |
| Nomada alboguttata |  |  | 1 |  |  | 1 | 0 | 0 | 0 | 1 | 0 | 0 | 0 | 1 | 0 | 0 | 1 | 0 |  |
| Nomada argentata |  |  | 1 |  |  | 1 | 0 | 0 | 0 | 0 | 0 | 0 | 0 | 0 | 1 | 0 | 1 | 0 |  |
| Nomada armata |  |  | 1 |  |  | 1 | 0 | 0 | 0 | 1 | 0 | 0 | 0 | 1 | 0 | 0 | 1 | 0 |  |
| Nomada atroscutellaris |  |  | 1 |  |  | 1 | 0 | 0 | 0 | 0 | 0 | 0 | 1 | 0 | 0 | 0 | 1 | 0 |  |
| Nomada bifasciata |  |  | 1 |  |  | 0 | 1 | 0 | 0 | 0 | 0 | 0 | 0 | 1 | 0 | 1 | 0 | 0 |  |
| Nomada castellana |  |  | 1 |  |  | 1 | 0 | 0 | 0 | 0 | 0 | 0 | 0 | 1 | 0 | 0 | 0 | 1 |  |
| Nomada conjungens |  |  | 1 |  |  | 1 | 0 | 0 | 0 | 0 | 0 | 0 | 0 | 1 | 0 | 0 | 0 | 1 |  |
| Nomada distinguenda |  |  | 1 |  |  | 0 | 1 | 0 | 0 | 0 | 0 | 0 | 0 | 1 | 0 | 1 | 0 | 0 |  |
| Nomada emarginata |  |  | 1 |  |  | 1 | 0 | 0 | 0 | 1 | 0 | 0 | 0 | 1 | 0 | 0 | 0 | 1 |  |
| Nomada errans |  |  | 1 |  |  | 1 | 0 | 0 | 0 | 0 | 0 | 0 | 0 | 1 | 0 | 0 | 0 | 1 |  |
| Nomada fabriciana |  |  | 1 |  |  | 1 | 0 | 0 | 0 | 0 | 0 | 0 | 0 | 1 | 0 | 0 | 0 | 1 |  |
| Nomada facilis |  |  | 1 |  |  | 1 | 0 | 0 | 0 | 0 | 0 | 0 | 0 | 1 | 0 | 0 | 0 | 1 |  |
| Nomada femoralis |  |  | 1 |  |  | 1 | 0 | 0 | 0 | 0 | 0 | 0 | 0 | 1 | 0 | 0 | 0 | 1 |  |
| Nomada ferruginata |  |  | 1 |  |  | 1 | 0 | 0 | 0 | 0 | 0 | 0 | 0 | 1 | 0 | 0 | 1 | 0 |  |
| Nomada flava |  |  | 1 |  |  | 0 | 1 | 0 | 0 | 0 | 0 | 0 | 0 | 1 | 0 | 1 | 0 | 0 |  |
| Nomada flavoguttata |  |  | 1 |  |  | 0 | 1 | 0 | 0 | 0 | 0 | 0 | 0 | 1 | 0 | 1 | 0 | 0 |  |
| Nomada flavopicta |  |  | 1 |  |  | 0 | 1 | 0 | 0 | 0 | 0 | 0 | 0 | 1 | 0 | 0 | 0 | 1 |  |
| Nomada fucata |  |  | 1 |  |  | 0 | 1 | 0 | 0 | 0 | 0 | 0 | 0 | 1 | 0 | 1 | 0 | 0 |  |
| Nomada fulvicornis |  |  | 1 |  |  | 0 | 1 | 0 | 0 | 0 | 0 | 0 | 0 | 1 | 0 | 1 | 0 | 0 |  |
| Nomada furva |  |  | 1 |  |  | 0 | 1 | 0 | 0 | 0 | 0 | 0 | 0 | 1 | 0 | 1 | 0 | 0 |  |
| Nomada furvoides |  |  | 1 |  |  | 0 | 1 | 0 | 0 | 0 | 0 | 0 | 1 | 0 | 0 | 1 | 0 | 0 |  |
| Nomada fuscicornis |  |  | 1 |  |  | 1 | 0 | 0 | 0 | 0 | 0 | 0 | 0 | 1 | 0 | 0 | 1 | 0 |  |
| Nomada goodeniana |  |  | 1 |  |  | 0 | 1 | 0 | 0 | 0 | 0 | 0 | 0 | 1 | 0 | 1 | 0 | 0 |  |
| Nomada hirtipes |  |  | 1 |  |  | 1 | 0 | 0 | 0 | 0 | 0 | 0 | 1 | 0 | 0 | 0 | 0 | 1 |  |
| Nomada integra |  |  | 1 |  |  | 1 | 0 | 0 | 0 | 0 | 0 | 0 | 0 | 1 | 0 | 0 | 0 | 1 |  |
| Nomada lathburiana |  |  | 1 |  |  | 1 | 0 | 0 | 0 | 0 | 0 | 0 | 0 | 1 | 0 | 0 | 0 | 1 |  |
| Nomada marshamella |  |  | 1 |  |  | 1 | 0 | 0 | 0 | 0 | 0 | 0 | 0 | 1 | 0 | 1 | 0 | 0 |  |
| Nomada minuscula |  |  | 1 |  |  | 1 | 0 | 0 | 0 | 0 | 0 | 0 | 0 | 1 | 0 | 0 | 1 | 0 |  |
| Nomada mutabilis |  |  | 1 |  |  | 1 | 0 | 0 | 0 | 1 | 0 | 0 | 0 | 1 | 0 | 0 | 1 | 0 |  |
| Nomada mutica |  |  | 1 |  |  | 1 | 0 | 0 | 0 | 0 | 0 | 0 | 0 | 0 | 1 | 0 | 0 | 1 |  |
| Nomada obtusifrons |  |  | 1 |  |  | 0 | 0 | 1 | 1 | 0 | 0 | 0 | 0 | 0 | 1 | 0 | 0 | 1 |  |
| Nomada panzeri |  |  | 1 |  |  | 1 | 0 | 0 | 0 | 0 | 0 | 0 | 0 | 1 | 0 | 0 | 0 | 1 |  |
| Nomada pleurosticta |  |  | 1 |  |  | 1 | 0 | 0 | 0 | 1 | 0 | 0 | 0 | 0 | 1 | 0 | 1 | 0 |  |
| Nomada posthuma |  |  | 1 |  |  | 1 | 0 | 0 | 0 | 0 | 1 | 0 | 0 | 0 | 0 | 0 | 0 | 1 |  |
| Nomada rhenana |  |  | 1 |  |  | 1 | 0 | 0 | 0 | 1 | 0 | 0 | 0 | 1 | 0 | 0 | 1 | 0 |  |
| Nomada roberjeotiana |  |  | 1 |  |  | 1 | 0 | 0 | 0 | 1 | 0 | 0 | 0 | 0 | 1 | 0 | 1 | 0 |  |
| Nomada ruficornis |  |  | 1 |  |  | 1 | 0 | 0 | 0 | 0 | 0 | 0 | 0 | 1 | 0 | 0 | 0 | 1 |  |
| Nomada rufipes |  |  | 1 |  |  | 1 | 0 | 0 | 0 | 1 | 0 | 0 | 0 | 0 | 1 | 0 | 1 | 0 |  |
| Nomada sexfasciata |  |  | 1 |  |  | 1 | 0 | 0 | 0 | 1 | 0 | 0 | 0 | 1 | 0 | 0 | 1 | 0 |  |
| Nomada sheppardana |  |  | 1 |  |  | 1 | 0 | 0 | 0 | 1 | 0 | 0 | 0 | 1 | 0 | 0 | 1 | 0 |  |
| Nomada signata |  |  | 1 |  |  | 1 | 0 | 0 | 0 | 0 | 0 | 0 | 1 | 0 | 0 | 1 | 0 | 0 |  |
| Nomada striata |  |  | 1 |  |  | 1 | 0 | 0 | 0 | 1 | 0 | 0 | 0 | 1 | 0 | 0 | 1 | 0 |  |
| Nomada symphyti |  |  | 1 |  |  | 0 | 0 | 1 | 1 | 0 | 0 | 0 | 1 | 0 | 0 | 0 | 0 | 1 |  |
| Nomada trapeziformis |  |  | 1 |  |  | 1 | 0 | 0 | 0 | 1 | 1 | 0 | 0 | 0 | 0 | 0 | 1 | 0 |  |
| Nomada trispinosa |  |  | 1 |  |  | 1 | 0 | 0 | 0 | 0 | 1 | 0 | 0 | 0 | 0 | 0 | 1 | 0 |  |
| Nomada villosa |  |  | 1 |  |  | 1 | 0 | 0 | 0 | 1 | 0 | 0 | 0 | 1 | 0 | 0 | 1 | 0 |  |
| Nomada zonata |  |  | 1 |  |  | 1 | 0 | 0 | 0 | 0 | 0 | 0 | 0 | 1 | 0 | 0 | 1 | 0 |  |
| Osmia aurulenta | 1 | 0 | 0 | 0 | 1 | 1 | 0 | 0 | 0 | 1 | 0 | 0 | 0 | 1 | 0 | 0 | 1 | 0 |  |
| Osmia bicolor | 1 | 0 | 0 | 0 | 1 | 0 | 1 | 0 | 0 | 0 | 0 | 0 | 0 | 1 | 0 | 1 | 0 | 0 |  |
| Osmia bicornis | 1 | 0 | 0 | 0 | 1 | 1 | 0 | 0 | 0 | 1 | 0 | 0 | 0 | 1 | 0 | 1 | 0 | 0 |  |
| Osmia brevicornis | 1 | 0 | 0 | 1 | 0 | 1 | 0 | 0 | 0 | 1 | 0 | 0 | 0 | 1 | 0 | 0 | 1 | 0 |  |
| Osmia caerulescens | 1 | 0 | 0 | 0 | 1 | 0 | 1 | 0 | 0 | 0 | 0 | 0 | 0 | 1 | 0 | 1 | 0 | 0 |  |
| Osmia cerinthidis | 1 | 0 | 0 | 1 | 0 | 0 | 1 | 0 | 0 | 0 | 1 | 0 | 0 | 0 | 0 | 0 | 1 | 0 |  |
| Osmia leaiana | 1 | 0 | 0 | 1 | 0 | 0 | 0 | 0 | 1 | 0 | 0 | 0 | 0 | 1 | 0 | 0 | 0 | 1 |  |
| Osmia melanogaster | 1 | 0 | 0 | 1 | 0 | 1 | 0 | 0 | 0 | 1 | 0 | 1 | 0 | 0 | 0 | 0 | 1 | 0 |  |
| Osmia niveata | 1 | 0 | 0 | 1 | 0 | 0 | 0 | 1 | 0 | 0 | 0 | 0 | 0 | 1 | 0 | 0 | 1 | 0 |  |
| Osmia parietina | 1 | 0 | 0 | 0 | 1 | 0 | 0 | 1 | 0 | 0 | 0 | 0 | 0 | 0 | 0 | 0 | 0 | 1 |  |
| Osmia pilicornis | 1 | 0 | 0 | 0 | 1 | 0 | 0 | 1 | 0 | 0 | 0 | 0 | 0 | 0 | 0 | 0 | 0 | 1 |  |
| Osmia spinulosa | 1 | 0 | 0 | 1 | 0 | 1 | 0 | 0 | 0 | 1 | 0 | 0 | 0 | 1 | 0 | 0 | 1 | 0 |  |
| Osmia villosa | 1 | 0 | 0 | 1 | 0 | 0 | 0 | 1 | 0 | 0 | 0 | 0 | 0 | 0 | 0 | 0 | 1 | 0 |  |
| Osmia xanthomelana | 1 | 0 | 0 | 1 | 0 | 1 | 0 | 0 | 0 | 1 | 0 | 0 | 0 | 0 | 0 | 0 | 0 | 1 |  |
| Panurginus labiatus | 1 | 0 | 0 | 1 | 0 | 1 | 0 | 0 | 0 | 1 | 1 | 0 | 0 | 0 | 0 | 0 | 1 | 0 |  |
| Panurgus banksianus | 1 | 0 | 0 | 1 | 0 | 1 | 0 | 0 | 0 | 0 | 0 | 0 | 0 | 1 | 0 | 0 | 1 | 0 |  |
| Panurgus calcaratus | 1 | 0 | 0 | 1 | 0 | 1 | 0 | 0 | 0 | 0 | 0 | 0 | 0 | 1 | 0 | 0 | 1 | 0 |  |
| Pseudoanthidium nanum | 1 | 0 | 0 | 1 | 0 | 0 | 1 | 0 | 0 | 0 | 1 | 0 | 0 | 0 | 0 | 0 | 1 | 0 |  |
| Rophites hartmanni | 1 | 0 | 0 | 1 | 0 | 1 | 0 | 0 | 0 | 1 | 0 | 1 | 0 | 0 | 0 | 0 | 1 | 0 |  |
| Rophites quinquespinosus | 1 | 0 | 0 | 1 | 0 | 1 | 0 | 0 | 0 | 1 | 0 | 0 | 0 | 1 | 0 | 0 | 1 | 0 |  |
| Sphecodes albilabris |  |  | 1 |  |  | 1 | 0 | 0 | 0 | 1 | 0 | 0 | 0 | 1 | 0 | 0 | 1 | 0 |  |
| Sphecodes crassus |  |  | 1 |  |  | 0 | 1 | 0 | 0 | 0 | 0 | 0 | 0 | 1 | 0 | 1 | 0 | 0 |  |
| Sphecodes ephippius |  |  | 1 |  |  | 0 | 1 | 0 | 0 | 0 | 0 | 0 | 0 | 1 | 0 | 1 | 0 | 0 |  |
| Sphecodes ferruginatus |  |  | 1 |  |  | 0 | 0 | 1 | 0 | 0 | 0 | 0 | 0 | 1 | 0 | 0 | 1 | 0 |  |
| Sphecodes geoffrellus |  |  | 1 |  |  | 0 | 1 | 0 | 0 | 0 | 0 | 0 | 0 | 1 | 0 | 1 | 0 | 0 |  |
| Sphecodes gibbus |  |  | 1 |  |  | 0 | 1 | 0 | 0 | 0 | 0 | 0 | 0 | 1 | 0 | 1 | 0 | 0 |  |
| Sphecodes hyalinatus |  |  | 1 |  |  | 0 | 0 | 1 | 0 | 1 | 0 | 0 | 0 | 0 | 1 | 0 | 1 | 0 |  |
| Sphecodes longulus |  |  | 1 |  |  | 0 | 1 | 0 | 0 | 0 | 0 | 0 | 0 | 1 | 0 | 0 | 1 | 0 |  |
| Sphecodes majalis |  |  | 1 |  |  | 1 | 0 | 0 | 0 | 1 | 0 | 1 | 0 | 0 | 0 | 0 | 0 | 1 |  |
| Sphecodes marginatus |  |  | 1 |  |  | 1 | 0 | 0 | 0 | 1 | 0 | 1 | 0 | 0 | 0 | 0 | 1 | 0 |  |
| Sphecodes miniatus |  |  | 1 |  |  | 0 | 1 | 0 | 0 | 0 | 0 | 0 | 0 | 1 | 0 | 0 | 1 | 0 |  |
| Sphecodes monilicornis |  |  | 1 |  |  | 0 | 1 | 0 | 0 | 0 | 0 | 0 | 0 | 1 | 0 | 0 | 1 | 0 |  |
| Sphecodes niger |  |  | 1 |  |  | 0 | 1 | 0 | 0 | 0 | 0 | 0 | 0 | 0 | 1 | 0 | 1 | 0 |  |
| Sphecodes pellucidus |  |  | 1 |  |  | 1 | 0 | 0 | 0 | 1 | 0 | 0 | 0 | 1 | 0 | 0 | 1 | 0 |  |
| Sphecodes puncticeps |  |  | 1 |  |  | 1 | 0 | 0 | 0 | 0 | 0 | 0 | 0 | 1 | 0 | 0 | 1 | 0 |  |
| Sphecodes reticulatus |  |  | 1 |  |  | 1 | 0 | 0 | 0 | 1 | 0 | 0 | 0 | 1 | 0 | 0 | 1 | 0 |  |
| Sphecodes rubicundus |  |  | 1 |  |  | 1 | 0 | 0 | 0 | 1 | 0 | 0 | 0 | 1 | 0 | 0 | 1 | 0 |  |
| Sphecodes rufiventris |  |  | 1 |  |  | 1 | 0 | 0 | 0 | 1 | 0 | 0 | 0 | 1 | 0 | 0 | 1 | 0 |  |
| Sphecodes scabricollis |  |  | 1 |  |  | 1 | 0 | 0 | 0 | 0 | 0 | 0 | 0 | 1 | 0 | 0 | 1 | 0 |  |
| Sphecodes schenckii |  |  | 1 |  |  | 1 | 0 | 0 | 0 | 1 | 0 | 1 | 0 | 0 | 0 | 0 | 1 | 0 |  |
| Stelis breviuscula |  |  | 1 |  |  | 0 | 0 | 1 | 0 | 0 | 0 | 0 | 0 | 1 | 0 | 0 | 0 | 1 |  |
| Stelis minima |  |  | 1 |  |  | 0 | 0 | 1 | 0 | 0 |  |  |  |  |  | 0 | 0 | 1 |  |
| Stelis minuta |  |  | 1 |  |  | 0 | 0 | 1 | 0 | 0 | 0 | 0 | 0 | 0 | 0 | 0 | 0 | 1 |  |
| Stelis ornatula |  |  | 1 |  |  | 0 | 0 | 1 | 0 | 0 | 0 | 0 | 0 | 1 | 0 | 0 | 0 | 1 |  |
| Stelis phaeoptera |  |  | 1 |  |  | 0 | 0 | 1 | 0 | 0 | 0 | 0 | 0 | 1 | 0 | 0 | 0 | 1 |  |
| Stelis punctulatissima |  |  | 1 |  |  | 0 | 0 | 1 | 0 | 0 | 0 | 0 | 0 | 1 | 0 | 0 | 0 | 1 |  |
| Stelis signata |  |  | 1 |  |  | 1 | 0 | 0 | 0 | 1 | 0 | 1 | 0 | 0 | 0 | 0 | 0 | 1 |  |
| Thyreus orbatus |  |  | 1 |  |  | 0 | 1 | 0 | 0 | 0 | 0 | 1 | 0 | 0 | 0 | 0 | 1 | 0 |  |
| Trachusa byssina | 1 | 0 | 0 | 1 | 0 | 0 | 0 | 1 | 0 | 0 | 0 | 0 | 0 | 0 | 0 | 0 | 0 | 1 |  |
| Xylocopa violacea | 1 | 0 | 0 | 0 | 1 | 1 | 0 | 0 | 0 | 1 | 0 | 0 | 0 | 1 | 0 | 0 | 1 | 0 |  |
|  |  |  |  |  |  |  |  |  |  |  |  |  |  |  |  |  |  |  |  |
